1 **Differential epigenetic landscapes and transcription factors explain X-linked gene**  
2 **behaviours during X-chromosome reactivation in the mouse inner cell mass**

3

4

5 Maud Borensztein<sup>1,2\*</sup>, Ikuhiro Okamoto<sup>1,3\*</sup>, Laurène Syx<sup>1,4</sup>, Guillaume Guilbaud<sup>5</sup>, Christel  
6 Picard<sup>1</sup>, Katia Ancelin<sup>1</sup>, Rafael Galupa<sup>1</sup>, Patricia Diabangouaya<sup>1</sup>, Nicolas Servant<sup>4</sup>,  
7 Emmanuel Barillot<sup>4</sup>, Azim Surani<sup>2</sup>, Mitinori Saitou<sup>6</sup>, Chong-Jian Chen<sup>7</sup>, Konstantinos  
8 Anastassiadis<sup>8</sup> and Edith Heard<sup>1</sup>.

9

10 **\* These authors contributed equally.**

11

12 1 Institut Curie, PSL Research University, CNRS UMR3215, INSERM U934, 26 Rue d'Ulm,  
13 75248 Paris Cedex 05, France

14 2 Wellcome Trust Cancer Research UK Gurdon Institute, Department of Physiology,  
15 Development and Neuroscience, University of Cambridge, Tennis Court Road, Cambridge  
16 CB2 1QN, United Kingdom

17 3 Department of Anatomy and Cell Biology, Graduate School of Medicine, Kyoto  
18 University, Yoshida-Konoe-cho, Sakyo-ku, Kyoto 606-8501, Japan; JST, ERATO, Yoshida-  
19 Konoe-cho, Sakyo-ku, Kyoto 606-8501, Japan.

20 4 Institut Curie, PSL Research University, Mines Paris Tech, INSERM U900, F-75005, Paris,  
21 France.

22 5 Medical Research Council Laboratory of Molecular Biology, Francis Crick Avenue,  
23 Cambridge, CB2 0QH, UK.

24 6 Department of Anatomy and Cell Biology, Graduate School of Medicine, Kyoto  
25 University, Yoshida-Konoe-cho, Sakyo-ku, Kyoto 606-8501, Japan; JST, ERATO, Yoshida-

26 Konoe-cho, Sakyo-ku, Kyoto 606-8501, Japan; Center for iPS Cell Research and  
27 Application, Kyoto University, 53 Kawahara-cho, Shogoin, Sakyo-ku, Kyoto 606-8507,  
28 Japan; Institute for Integrated Cell-Material Sciences, Kyoto University, Yoshida-  
29 Ushinomiya-cho, Sakyo-ku, Kyoto 606-8501, Japan.

30 7 Annoroad Gene Technology Co., Ltd, Beijing, China

31 8 Biotechnology Center, Technische Universität Dresden, Tatzberg 47, 01307 Dresden,  
32 Germany

33

34 Corresponding author: Edith Heard ([edith.heard@curie.fr](mailto:edith.heard@curie.fr))

35

36

37

38

39

40

41

42 **Abstract**

43

44 X-chromosome inactivation (XCI) is established in two waves during mouse development.

45 First, silencing of the paternal X chromosome (Xp) is triggered, with transcriptional

46 repression of most genes and enrichment of epigenetic marks such as H3K27me3 being

47 achieved in all cells by the early blastocyst stage. XCI is then reversed in the inner cell mass

48 (ICM), followed by a second wave of maternal or paternal XCI, in the embryo-proper.

49 Although the role of Xist RNA in triggering XCI is now clear, the mechanisms underlying

50 Xp reactivation in the inner cell mass have remained enigmatic. Here we use *in vivo* single

51 cell approaches (allele-specific RNAseq, nascent RNA FISH and immunofluorescence) and

52 find that different genes show very different timing of reactivation. We observe that the genes

53 reactivate at different stages and that initial enrichment in H3K27me3 anti-correlates with the

54 speed of reactivation. To define whether this repressive histone mark is lost actively or

55 passively, we investigate embryos mutant for the X-encoded H3K27me3 demethylase, UTX.

56 Xp genes that normally reactivate slowly are retarded in their reactivation in *Utx* mutants,

57 while those that reactive rapidly are unaffected. Therefore, efficient reprogramming of some

58 X-linked genes in the inner cell mass is very rapid, indicating minimal epigenetic memory

59 and potentially driven by transcription factors, whereas others may require active erasure of

60 chromatin marks such as H3K27me3.

61

62

63

64

65

## 66 **Introduction**

67

68 In mammals, dosage compensation between XX females and XY males is achieved by  
69 inactivating one of two X chromosomes during early female embryogenesis<sup>1</sup>. In the mouse,  
70 X-chromosome inactivation (XCI) occurs in two waves during early female development.  
71 The first wave takes place during pre-implantation development and is subject to genomic  
72 imprinting, resulting in preferential inactivation of the paternal X (Xp) chromosome<sup>2</sup>. In the  
73 trophoctoderm (TE) and the primitive endoderm (PrE), which contribute respectively to the  
74 placenta and yolk sac, silencing of the Xp is maintained<sup>3,4</sup>. In contrast, in the epiblast  
75 precursor cells within the inner cell mass (ICM) of the blastocyst, (which correspond to  
76 mESCs), the Xp is reactivated and the second XCI wave and random inactivation of either  
77 Xp or the maternal X chromosome (Xm), occurs shortly after<sup>5,6</sup>. The inactive state is then  
78 stably maintained and transmitted through cell divisions in the soma.

79 Initiation of both imprinted and random XCI is dependent on the Xist long noncoding  
80 RNA (lncRNA) that coats the future inactive X (Xi) chromosome *in cis*. The essential role of  
81 *Xist* in initiation of imprinted XCI has been recently highlighted *in vivo* using single cell or  
82 single embryo allele-specific transcriptome analyses in early pre-implantation  
83 development<sup>7,8</sup>. Xist RNA coating is followed by gene silencing and several epigenetic  
84 changes, such as the depletion of active chromatin marks (*eg* tri-methylation of histone H3  
85 Lysine 4 (H3K4me3), H3 and H4 acetylation), and recruitment of different epigenetic  
86 modifiers to the future Xi, including the polycomb repressive complex proteins PRC1 and  
87 PRC2, that result respectively in H2A ubiquitination and di- and tri-methylation of histone H3  
88 Lysine 27 (H3K27me3)<sup>9</sup>. The inactive X chromosome is also enriched for mono-methylation  
89 of histone H4 lysine K20, di-methylation of histone H3 lysine K9 and the histone variant

90 macroH2A<sup>5,6,10</sup>. Furthermore, our previous studies have shown that during the XCI process,  
91 different genes follow very different silencing kinetics<sup>7,11</sup>. Only during random XCI, in the  
92 epiblast, does DNA methylation of CpG islands occur to further lock in the silent state of X-  
93 linked genes, accounting for the highly stable inactive state of the Xi in the embryo-proper,  
94 unlike in the extra-embryonic tissues where the Xp is more labile<sup>12-14</sup>.

95        Much less is known about how the inactive state of the Xp is reversed in the inner cell  
96 mass (ICM) of the blastocyst. X-chromosome reactivation is associated with loss of Xist  
97 coating and repressive epigenetic marks, such as H3K27me3, from the inactive X<sup>5,6</sup>.  
98 Repression of *Xist* has been linked with pluripotency factors such as Nanog and Prdm14<sup>15,16</sup>.  
99 Studies on the reprogramming of somatic cells to induced pluripotency (iPSCs) have shown  
100 that X-chromosome reactivation required *Xist* repression and that occurs after pluripotency  
101 genes are expressed<sup>17</sup>. These observations suggest that the pluripotency program could enable  
102 X-chromosome reactivation via *Xist* repression as a first step. However, a previous study  
103 proposed that the reactivation of Xp-linked genes in the ICM operates independently of loss  
104 of Xist RNA and H3K27me3 based on fluorescent *in situ* hybridisation of nascent RNA  
105 (RNA FISH) and allele-specific RT-PCR analysis of a few (7) X-linked genes<sup>18</sup>. Therefore, it  
106 is still unclear whether X-chromosome reactivation in the ICM actually relies on pluripotency  
107 factors and/or on loss of epigenetic marks such as H3K27me3. Furthermore, whether loss of  
108 H3K27me3 is an active or a passive process has remained an open question. Given the speed  
109 of H3K27me3 loss on the Xp in the ICM from embryonic days 3.5 to 4.5 (E3.5-E4.5, ie 1-2  
110 cell cycles), it is possible that active removal of the methylation mark may occur. Genome-  
111 wide removal of the tri-methylation of H3K27 may be catalysed by the JmjC-domain  
112 demethylase proteins: UTX (encoded by the X-linked gene *Kdm6a*), UTY (a Y-linked gene)  
113 and JMJD3 (encoded by *Kdm6b*)<sup>19-22</sup>. Diverse roles have been proposed for these

114 demethylases<sup>23–25</sup>. JMJD3 appears to inhibit reprogramming<sup>26</sup>, whereas UTX plays a role in  
115 differentiation of the ectoderm and mesoderm<sup>27</sup> and has been proposed to promote somatic  
116 and germ cell epigenetic reprogramming<sup>24</sup>. Interestingly, the *Utx* gene escapes from X-  
117 chromosome inactivation (*ie* is transcribed from both the active and inactive X  
118 chromosomes)<sup>28</sup>. This raises the intriguing possibility that *Utx* might have a female-specific  
119 role in reprogramming the Xi in the inner cell mass of the mouse blastocyst. *Utx* knockout  
120 mouse studies have suggested an important role of *Utx* during mouse embryogenesis and  
121 germline development, but its exact molecular functions in X-linked gene transcriptional  
122 dynamics have not been assessed<sup>21,22,24,29,30</sup>.

123         In this study we set out to obtain an in-depth view of the nature of the X-chromosome  
124 reactivation process in the ICM *in vivo*. We have defined the chromosome wide timing of X-  
125 linked gene reactivation and examined what the underlying mechanisms might be both at the  
126 transcription factor and chromatin levels. This work points to distinct mechanisms at play for  
127 the reactivation of X-linked genes in the ICM, with broad implications for our understanding  
128 of epigenetic reprogramming in general.

129

130

131 **Results**

132

133 **Chromatin dynamics of the paternal X chromosome in the ICM of early to late pre-**  
134 **implantation embryos**

135 Paternal X-chromosome reactivation has been described to occur in the pre-epiblast cells of  
136 pre-implantation embryos<sup>5,6</sup>, but the exact timing of X-chromosome reactivation and how the  
137 epigenetic marking of the inactive X chromosome (Xi) changes during this reprogramming is  
138 less clear. To determine the dynamics of chromatin changes on the Xp in the ICM during  
139 E3.5 (early) to E4.0 (mid) pre-implantation development, we performed immunosurgery on  
140 blastocysts at different stages in order to destroy outer TE cells and specifically recover the  
141 ICMs. By combining immunofluorescence with Xist RNA FISH, we analysed the enrichment  
142 of H3K27me3, as it is known to accumulate on the paternal inactive X shortly after the  
143 initiation of imprinted XCI, from E2.5 (16-cell stage)<sup>5</sup>. As previously reported<sup>5,6</sup>, H3K27m3  
144 was found to be enriched on the Xist RNA coated X chromosome in almost all ICM cells of  
145 early pre-implantation blastocyst embryos (E3.5, 10-25 cells/ICM) (Figures 1a, b). Just half a  
146 day later, (E4.0, 20-40 cells/ICM), H3K27me3 enrichment and Xist RNA coating were lost  
147 from the Xp in approximately 25% of cells within the ICM (Figures 1a, b). The cells that lost  
148 Xist RNA coating and H3K27me3 enrichment on the Xp at E4.0 were often clustered  
149 together in close proximity in the ICM, suggesting that they represent the pre-epiblast  
150 population (Figure 1a). These results show that global Xp enrichment of H3K27me3 and Xist  
151 RNA coating are tightly correlated in the mouse blastocyst and that loss of this enrichment  
152 occurs with similar dynamics to loss of Xist coating in a subpopulation of ICM cells,  
153 presumably the pre-epiblast, between E3.5 and E4.0.

154

155 **Different X-linked genes show different timing of reactivation and lineage-specificity.**

156 A previous report based on RNA-FISH and RT-PCR had shown that reactivation of seven  
157 Xp-linked genes seems to initiate despite the presence of Xist RNA coating and H3K27me3  
158 enrichment of the Xp in ICM cells at E3.5 (early stage blastocysts)<sup>18</sup>. Combining RNA FISH  
159 and anti-H3K27me3 immunofluorescence, we analysed expression of two of these genes,  
160 *Rnf12* and *Abcb7* (both examined in the Williams *et al.*, 2011 paper<sup>18</sup>) that are repressed  
161 during imprinted XCI by E2.5<sup>7,11,31</sup>. Strikingly, *Abcb7* and *Rnf12* showed very different  
162 reactivation behaviours in the early, E3.5, ICM (Figure 2a). While *Rnf12* exhibited low  
163 biallelic expression (<20% of ICM cells), suggesting its Xp silencing is maintained, *Abcb7*  
164 was biallelically expressed in almost all cells, despite the presence of Xist RNA coating and  
165 H3K27me3 enrichment on the Xp (Figures 2a, b, c). These results are only partially  
166 concordant with the Williams *et al.* study<sup>18</sup>, however the apparent discrepancy in *Rnf12*  
167 reactivation timing may be due to differences in the exact stages of blastocyst development  
168 examined, or to the different mouse strains used (B6D2F1 and B6xCast here, compared to  
169 CD-1 and CD-1xJF1 in Williams *et al.*<sup>18</sup>).

170 We examined further genes for their timing of Xi reactivation in the ICM. We  
171 performed RNA FISH in pre-implantation (E3.5, early) through to peri-implantation (E4.5,  
172 late) blastocysts for 8 X-linked genes together with Xist (*Atp6ap2*, *Fmr1*, *Kif4*, *Rnf12*, *Abcb7*,  
173 *Atrx*, *Atp7a* and *Pdhal*) (Figure 2b). The genes were chosen based on their known range of  
174 silencing kinetics during imprinted XCI in pre-implantation embryos, including genes  
175 silenced early (prior to E3.0 such as *Kif4*, *Rnf12*, *Atp7a*, *Atrx* and *Abcb7*), late (after E3.0 e.g.  
176 *Pdhal*, *Fmr1*), or that escape XCI (e.g. *Atp6ap2*)<sup>7,11</sup>. Amongst the candidates, *Rnf12*, *Atp7a*,  
177 *Abcb7* and *Pdhal* were all previously described as being reactivated at the mid blastocyst  
178 stage (E4.0)<sup>18</sup>.

179 Increased frequencies of biallelic expression were observed for most genes in female



180 ICM cells from the E4.0 stage onward (*Fmr1*, *Kif4*, *Atp7a* and *Pdha1* and *Rnf12*), indicating  
181 that they have reactivated in a subset of ICM cells (presumably pre-epiblast cells) (Figure  
182 2c). However *Atrx* displayed biallelic expression as early as E3.5, similarly to *Abcb7* gene  
183 (also shown in Figure 2a). Thus, reactivation of *Atrx* and *Abcb7* occurs in the early ICM cells  
184 prior to any lineage segregation between epiblast (Epi) and primitive endoderm (PrE) cells<sup>32-</sup>  
185 <sup>34</sup>. Interestingly, just half a day later at E4.0, a decrease in biallelic expression of these two  
186 genes was seen in 30% to 60% of ICM cells (Figure 2c). Previous studies have shown that X-  
187 chromosome reactivation occurs in epiblast cells<sup>5,6</sup>, whereas PrE-derived tissues maintain an  
188 inactive Xp<sup>4</sup>. The decrease we observed in biallelic *Atrx* and *Abcb7* expression at E4.0 and  
189 E4.5 in ICM cells could indicate that these genes are silenced again, presumably in future  
190 primitive endoderm cells. In the case of *Atp6ap2*, which is a gene that normally escapes from  
191 XCI, as expected, it was found to be biallelically expressed in 60 to 80% of ICM cells at all  
192 stages<sup>11</sup> (Figure 2c). Taken together, our data suggests that the reactivation of X-linked genes  
193 occurs with very different timing in ICM cells during early to late blastocyst stages.  
194 Furthermore, we find that a subset of genes may be reactivated early on, but then become  
195 rapidly silenced again in a sub-population of cells, presumably destined to become PrE.

196 To examine whether biallelic expression of more slowly reactivated genes correlates  
197 with pre-epiblast differentiation (and thus NANOG protein), we performed NANOG  
198 immunofluorescence combined with RNA FISH for Xist and two such X-linked genes (*Kif4*  
199 and *Atp7a*) in ICM cells of E3.5 (early) and E3.75 (mid) pre-implantation stage embryos  
200 (Figure 2d). As expected from our previous RNA FISH (Figure 2c), we found that cells  
201 mostly displayed monoallelic expression of X-linked genes (*Kif4*, and *Atp7a*) at E3.5. And  
202 this was the case in both NANOG positive and negative cell populations (Figure 2d, 2e, and  
203 2f). *Kif4* and *Atp7a* then showed reactivation at E3.75 (Figure 2c) and the biallelic cells are

204 almost all NANOG positive (Figure 2e). Moreover, biallelic expression of these X-linked  
205 genes was always observed in the absence of a Xist RNA cloud in NANOG-positive cells  
206 (Figure 2e, 2f). These results corroborate previous observations that *Atp7a* is reactivated only  
207 in cells expressing Nanog<sup>18</sup>. Our results suggest that both Nanog expression and loss of Xist  
208 RNA coating are linked to biallelic expression of late reactivated genes, but that Nanog  
209 expression alone is not sufficient. Taken together, our data point to reactivation in a lineage-  
210 specific manner beyond the mid ICM stage for genes that are late-reactivated. They also  
211 reveal a lineage-independent reactivation of the early-reactivated genes at E3.5 ICM.

212

### 213 **Single cell RNA sequencing of early and late pre-implantation female ICMs**

214 The remarkable diversity in X-linked gene reactivation observed above (Figure 2) prompted  
215 us to explore the Xp reactivation process on a chromosome-wide scale. Furthermore, given  
216 the mixture of cells in the ICM, some of which are destined to become PrE, while others will  
217 become Epiblast, we were interested to know whether reactivation or silencing maintenance  
218 of Xp-linked genes correlated with PrE factor (*eg.* *Gata4* or *Gata6*) and/or pluripotency factor  
219 expression (*eg.* *Nanog*, *Oct4*, *Sox2*) at the single-cell level<sup>35</sup>. We therefore performed single-  
220 cell RNAseq (scRNAseq) on ICMs of E3.5 and E4.0 pre-implantation female hybrid F1  
221 embryos as well as used published trophoctoderm (TE) cells where imprinted XCI is  
222 maintained<sup>7</sup>. The F1 hybrid blastocysts were derived from interspecific crosses between *Mus*  
223 *musculus domesticus* (C57Bl6/J) females and *Mus musculus Castaneus* (Cast) males. Single  
224 cells from individual ICMs were collected and polyadenylated RNA amplified from each cell  
225 according to the Tang *et al* protocol<sup>36</sup> (n=17 cells from E3.5 ICM, and n=23 cells from E4.0  
226 ICM and n=3 cells from E3.5 TE as control of XCI, Supplementary Table 1). We first  
227 assessed the extent to which transcriptomes of single cells from early (E3.5) and mid (E4.0)

228 blastocysts were associated with each other, using principal component analyses (PCA,  
229 Figure 3a). We found that E3.5 ICM cells still showed substantial heterogeneity compared to  
230 E4.0 ICM single cells, which clustered into two distinct groups. Nevertheless, some signs that  
231 2 sub-populations are emerging could be seen at E3.5 for some ICM cells. This revealed that  
232 developmental stage (E3.5 versus E4.0) does not seem to be the primary source of variability  
233 but that lineage specification between primitive endoderm and epiblast precursor cells could  
234 be important. We then also performed PCA analyses (Figure 3b) based on the expression  
235 levels of known pluripotency and differentiation factors, listed in Figure 3c. As expected  
236 from previous studies, E4.0 ICM cells fall into two clearly separated groups, either the PrE  
237 (expressing marker such as Gata4 and Gata6) or the Epi (expressing marker such as Nanog  
238 and Prdm14)<sup>32,33</sup>. No strong association was observed in E3.5 ICM cells with the exception of  
239 a few cells (n=3 potential pre-PrE and n=1 potential pre-Epi at E3.5, Figure 3b), supporting  
240 the idea that PrE and Epi lineages begin to be specified but are still not clearly established at  
241 the transcriptional level in E3.5 stage ICMs, as previously reported<sup>34</sup>. Next we performed a  
242 correlation analysis for single ICM cells and a few trophoctoderm cells as a control, based on  
243 the expression status of pluripotency and differentiation factors (Figure 3c). As shown in  
244 Figure 3c, we classified cells according to their developmental stage and  
245 pluripotency/differentiation factor status: E3.5\_TE (Trophoctoderm of pre-implantation  
246 blastocysts), E3.5\_ICM (Pre-lineage Inner cell mass of early pre-implantation blastocysts),  
247 E4.0\_PrE (Primitive endoderm precursor cells of late pre-implantation blastocysts) and  
248 E4.0\_Epi (Epiblast precursor cells of peri-implantation blastocysts). This clearly supports a  
249 shift from still rather heterogeneous transcriptomes in E3.5 ICM cells, into two well-defined  
250 subpopulations of pre-epiblast and primitive endoderm cells in E4.0 stage ICMs.

251

252 **Specific X-linked gene behaviour highlighted by allele-specific analyses during X-**  
253 **chromosome reactivation**

254 We next investigated chromosome-wide X-linked gene activity between early (E3.5) and mid  
255 (E4.0) ICMs. To assess the parental origin of transcripts, we took advantage of the high rate  
256 of polymorphisms between C57Bl6/J (maternal) and Cast (paternal) genomes that enabled us  
257 to distinguish X<sup>m</sup> and X<sup>p</sup> expression for informative transcripts (see Methods for expression  
258 thresholds and allele-specific pipeline). In this way an *in vivo* heatmap of X-linked gene  
259 activity was generated for early (E3.5\_ICM) and mid (E4.0\_PrE and E4.0\_Epi) blastocyst  
260 stages and this was compared to trophoctoderm cells at E3.5 (TE), extracted from the  
261 Borensztein et al. study<sup>7</sup>, as controls of X<sup>P</sup>CI maintenance (Figure 4a, Supplementary Figure  
262 1 and Supplementary Table 2). To follow X<sup>P</sup> reactivation by scRNAseq, we set a threshold of  
263 expression of RPRT=4 (Reads Per Retro-Transcribed length per million mapped reads, see  
264 methods) in at least 25% of the cells in both lineages (PrE and Epi) of mid blastocysts (n=116  
265 genes), as in our previously published scRNAseq analysis of X-linked gene kinetics<sup>7</sup>. Low-  
266 expressed genes were excluded from the analysis in order to avoid amplification biases due to  
267 single cell PCR amplification. Trophoctoderm cells (TE) from E3.5 female blastocysts were  
268 used as control for maintenance of imprinted XCI. They displayed 21% (18 out of 86) of  
269 biallelically expressed genes (allelic ratio >0.2, Figure 4a), and 17 of these genes are well-  
270 known escapees<sup>7</sup>. Interestingly, E3.5 ICM cells showed a higher number of biallelically-  
271 expressed genes when compared to TE. We found that 51% of X-linked genes were  
272 expressed from both X-chromosomes in E3.5 ICM (55 biallelic genes out of 107 in total, e.g.  
273 *Atrx*), despite the sustained expression of *Xist*. This supports our findings based on RNA  
274 FISH for early-reactivated genes (Figure 2) and further reveals the scale of such early  
275 reactivation. Intriguingly several of these reactivated genes (e.g *Atrx*, *Ubl4a* and *Eif1ax*) are

276 clearly rapidly silenced again half a day later in PrE precursor cells only, as defined by the  
277 expression of 23 differentiation and pluripotency markers (e.g Gata4, Gata6 and Nanog, see  
278 Figure 3) (Figure 4a right panel). These data suggest that oscillations in the expression states  
279 of some genes on the Xp (such as *Atrx*) occur within a sub-population of ICM cells that will  
280 give rise to the PrE, where XpCI is known to be maintained, ultimately<sup>4</sup>. Our RNA-FISH data  
281 confirms that *Atrx* is transiently expressed from both X chromosomes even in the cells that  
282 will give rise to the PrE as it is found biallelically expressed in 90-100% of early ICM cells  
283 (Figure 2c). Our results reveal that there may be fluctuations in the inactive state of some  
284 genes during ICM progression, in the precursor cells of the PrE, rather than a straightforward  
285 maintenance of Xp silencing as previously thought.

286 In epiblast precursor cells, based on pluripotency factor expression (Figure 3), at E4.0,  
287 we noticed an absence of *Xist* expression and a marked progression in X<sub>p</sub> chromosome  
288 reactivation as 77% of genes become biallelically expressed (89 out of 115, Figure 4a). Genes  
289 that showed reactivation only in epiblast precursor cells were classified as late-reactivated  
290 genes (Figure 4a) and confirmed our previous RNA-FISH data (e.g. *Rnf12*, *Kif4*, Figure 2).  
291 Interestingly, some genes classified as “very late reactivated” still appear to be repressed on  
292 the X<sub>p</sub>, even at E4.0. In the case of *Pdhal1*, this gene was found to be reactivated in about  
293 40% of ICM cells at E4.0 by RNA-FISH (Figure 2c), compared to 4% of paternal expression  
294 in PrE and 18% in Epi, by scRNAseq (Supplementary Table 2). This could be explained by  
295 differences between nascent (RNA-FISH) and mature RNA (scRNAseq) for this gene, if the  
296 levels of paternal mRNA are not yet high enough for scRNAseq detection even though the  
297 gene has begun to be transcribed.

298 We describe here that X-chromosome reactivation can initiate for some genes  
299 independently of *Xist* loss and before lineage segregation at E3.5 (Figures 2a and 4a,

300 Supplementary Table 2). However, in the epiblast precursor cells at E4.0, a higher percentage  
301 of biallelic X-linked genes was always observed in absence of Xist (Figure 4b). Indeed Xist  
302 expression levels and the percentage of biallelically expressed X-linked genes in single cells  
303 were anti-correlated ( $R=-0.47$ ,  $p=0.0018$ , Spearman correlation). Thus, taken together, our  
304 data suggest that some genes ( $n=26$  out of 116) undergo X-chromosome reactivation  
305 independently of Xist RNA and H3K27me3 loss, and that their expression fluctuates between  
306 early and mid ICMs, with many of them being re-silenced in the PrE lineage. The majority of  
307 X-linked genes will be reactivated later (E4.0), on the other hand, and only in epiblast  
308 precursor cells, in which pluripotency factors such as Nanog are expressed, and Xist RNA  
309 and H3K27me3 enrichment are lost (Figures 2 and 4).

310

### 311 **Differential TFs and H3K27me 3 enrichment in early and late reactivated genes**

312 Next, we set out to define the features that are associated with the different categories of  
313 genes along the X as defined by their reactivation kinetics (early, late and very late or  
314 escapees). We assessed whether the timing of reactivation could be linked to the kinetics or  
315 efficiency of silencing of a particular gene. For this, we used our previously reported allele-  
316 specific scRNAseq analysis of imprinted XCI from the 2-cell stage to the early blastocyst  
317 (60-64-cell stage)<sup>7</sup> and compared kinetics of silencing and timing of reactivation of X-linked  
318 genes. Correspondence analysis revealed that kinetics of reactivation of X-linked genes does  
319 not mirror their kinetics of silencing (Supplementary Figure 2a). Clearly the timing of  
320 reactivation is not simply about the lapse of time since silencing was initiated, nor about the  
321 location of a gene along the X chromosome (Supplementary Figure 2b). Although a slight  
322 tendency was observed for late and very late reactivated genes to be in close proximity of the  
323 *Xist* locus, *Atrx* and *Abcb7* genes are both silenced early, lie close to the *Xist* genomic locus

324 and yet are also reactivated early<sup>7,11,31</sup>. Furthermore, our previous work revealed that although  
325 early silenced genes preferentially lie inside the first *Xist* “entry” sites as defined by Engreitz  
326 et al in ESCs, the late and very late reactivated genes failed to show any significant  
327 proportion correlation with *Xist* entry sites (Supplementary Figure 2c)<sup>7,37</sup>. Gene expression  
328 level was also not found as an obvious predictor of early or late reactivation (Supplementary  
329 Figure 2d). We thus hypothesize that late and very late reactivated genes may have acquired  
330 an epigenetic signature that prevents their rapid reactivation in early ICM cells, compared to  
331 early-reactivated genes. Early-reactivated genes on the other hand, may become expressed  
332 more rapidly due to specific TFs overriding their silent state.

333 We first examined recent allele-specific ChIPseq data for H3K27me3 and H3K4me3  
334 in ICM of pre-implantation embryos (pooled between E3.5-E4.0)<sup>38</sup>. We overlapped the genes  
335 for which there is allelic information between this study and our different reactivation-timing  
336 groups and compared enrichment for H3K27me3 (left panel) and H3K4me3 (right panel)  
337 across their TSS (Figure 4c). We found a clear enrichment of H3K27me3 on the paternal  
338 allele but not on the maternal allele of late and very late reactivated genes compared to early-  
339 reactivated genes (respectively  $p=2.29*10^{-4}$  and  $p=2.51*10^{-2}$  by Wilcoxon test) and escapees  
340 (respectively  $p=1.95*10^{-6}$  and  $p=7.33*10^{-3}$  by Wilcoxon test) (Figure 4c left panel and  
341 Supplementary Figure 2e, left panel). Moreover, early-reactivated genes and escapees are  
342 enriched in the H3K4me3 histone mark compared to late (respectively  $p=1.62*10^{-3}$  and  
343  $p=2.09*10^{-7}$ ) and very late genes (respectively  $p=3.95*10^{-4}$  and  $p=6.73*10^{-8}$ ) (Figure 4c and  
344 Supplementary Figure 2e right panel). As expected, we confirmed that H3K4me3-highly  
345 enriched genes are globally more highly expressed than lowly enriched genes  
346 (Supplementary Figure 2f). However as no association was found between a high level of  
347 expression and early reactivation, we hypothesize that paternal enrichment of H3K4me3

348 could be a consequence of biallelic expression of early reactivated genes. Altogether, this  
349 highlights the asymmetric histone distribution between the different groups of genes during  
350 X-chromosome reactivation.

351 To explore the second hypothesis, that some TFs, including pluripotency factors,  
352 might drive expression from the Xp of a subset of early reactivated genes, we first analysed  
353 the correlation or anti-correlation between gene expression genome-wide and the degree of  
354 X-linked gene reactivation in female single cells (Supplementary Table 3, see Methods for  
355 details). As expected based on previous observations, Xp-chromosome reactivation correlates  
356 with pluripotency factors (e.g. *Esrrb*, *Sox2*, *Nanog*, *Oct4* and *Prdm14*) and anti-correlates  
357 with PrE differentiation factors, such as *Gata4*, *Sox17* and *Gata6*<sup>5,6,15,16</sup>. A gene ontology  
358 analysis of the top correlated genes (q-values <0.005) revealed that epigenetic modifiers are  
359 overrepresented (Supplementary Figure 2g) and corroborates our hypothesis that different  
360 epigenetic landscapes might at least partially underlie the different reactivation kinetics.

361 As X-chromosome reactivation is linked with epiblast formation and pluripotency  
362 gene expression, we then examined previously published datasets of transcription factor (TF)  
363 binding sites in mESCs (ChIPseq)<sup>39,40</sup>. In particular we analysed the occurrence of fixation  
364 sites at X-linked genes for pluripotency factors involved in Epiblast or embryonic stem cells  
365 differentiation (*Nanog*, *Esrrb*, *Klf4*, *Oct4*, *Sox2*, *Tcfcp211* and *Prdm14*) and the *Myc* family  
366 also found associated with X-chromosome reactivation to a lesser degree (Supplementary  
367 Table 3). Indeed, *Myc* factors are expressed in early and mid ICM cells and there is a slight  
368 but significant association between high expression of *Myc* and *Mycl* genes and high rate of  
369 X-linked gene reactivation (Supplementary Figure 2h). Half of the X-linked genes,  
370 independently of their kinetics of reactivation and including escapees, presented at least one  
371 binding site for the above-mentioned pluripotency factors (data not shown). Their expression



372 might be partially regulated by these factors<sup>15,16</sup>, but the binding of these factors alone cannot  
373 explain the behaviour of early reactivated genes. We next analysed for the presence of Myc  
374 family binding sites (Myc and Mycn binding sites, up to 3kb of the TSS and in gene body).  
375 Both escapees and early reactivated genes showed a surprisingly high enrichment for Myc  
376 factor binding sites, with respectively 42% (14 out of 33) and 31% (8 out of 26) showing at  
377 least one Myc binding site (Supplementary Figure 2i). In comparison, few late and very late  
378 reactivated genes displayed Myc binding sites with respectively 19% (6 out of 32) and 5% (1  
379 out of 21) of them containing at least one binding site (p=0.0269 by Kruskal-Wallis). Myc  
380 transcription factors could thus be involved in transcription activation of silent X-linked  
381 genes and they have already been linked with the hypertranscription state described in ESCs  
382 and Epiblast<sup>41</sup>. Early reactivated genes and escapees could thus be targeted for reactivation  
383 from the silenced paternal X by the Myc TF family in early ICM.

384 In conclusion, the early reactivation of some X-linked genes, even prior to global loss  
385 of Xist RNA coating and H3K27me3 loss at E3.5, may be partly due to transcriptional  
386 activation thanks to Myc TF family, a lack of H3K27me3 and an enrichment of H3K4me3,  
387 while the majority of genes that are reactivated later show higher H3K27me3 and lower  
388 H3K4m3 enrichment, indicating a different epigenetic memory and response to TFs.

389

### 390 **Involvement of the histone demethylase UTX in efficient reprogramming of late** 391 **reactivated genes.**

392 The above findings (Figures 2 and 4c) support a dependency between late and very-  
393 reactivated genes and loss of Xist and H3K27me3 from the Xp. To explore the hypothesis  
394 that epigenetic marking via H3K27me3 might play a role in the resistance of some genes to  
395 early Xp reactivation, we decided to impair H3K27me3 removal during the X-chromosome

396 reactivation process. To do so, we produced peri-implantation (E4.5, late, n=30-55 cells per  
397 ICM) embryos lacking the X-linked histone demethylase UTX, which is reported to be  
398 specific for H3K27 demethylation<sup>20-22</sup> and could promote reprogramming<sup>24</sup>. Interestingly *Utx*  
399 gene is expressed in pre-implantation embryos and remains high in early and mid ICM cells  
400 when it is down-regulated in trophectoderm (E3.5\_TE), in which Xp inactivation is  
401 maintained (Supplementary Figure 3a). Homozygous knock-out mutant *Utx*<sup>FDC/FDC</sup> female  
402 embryos were obtained after matings between *Utx*<sup>FDC/Y</sup> studs (knock-out males) and *Utx*<sup>FD/+</sup>;  
403 or *Utx*<sup>FD/FD</sup>;*GDF-9iCre* females (Figure 5a) (FD = Flp and Dre recombined conditional  
404 allele; FDC = Flp, Dre and Cre recombined knockout allele (the GDF-9-driven Cre enables  
405 efficient recombination in the maternal germ line)<sup>30</sup>. Absence of UTX protein was validated  
406 by immunofluorescence at late blastocyst stage (E4.5) (Supplementary Figure 3b). Our aim  
407 was to assess if loss of Utx correlates with an accumulation of H3K27me3 at the inactive X,  
408 and its impact on the transcription status of two late-reactivated genes (*Kif4* or *Rnf12*). We  
409 performed immunostainings on E4.5 control, heterozygous and mutant female ICMs (Figures  
410 5b and 5c). H3K27me3 enrichment on the Xp was retained in significantly more cells in *Utx*  
411 mutants compared to controls or heterozygous (respectively 73% versus 50% and 52%,  
412 p=0.0002, KW test). Furthermore a significantly higher proportion of Xist RNA negative  
413 cells with H3K27me3 enrichment was found in the mutant (5.1% vs 0.7% in controls,  
414 p=0.0067, KW test, Figure 5c and 5d). Altogether, our results are supportive of a scenario  
415 whereby UTX is actively involved in removal of H3K27me3 from the paternal X following  
416 Xist down regulation. Furthermore, when X-linked gene expression was assessed in the *Utx*  
417 mutant embryos, biallelic expression of *Kif4* or *Rnf12* were found with a corresponding  
418 absence of Xist, even in cells remaining H3K27me3 positive (Supplementary Figure 3c and  
419 3d).

420 To explore the impact on gene reactivation further, we performed RNA-FISH on  
421 several late- or very-late reactivated genes (*Kif4*, *Rnf12* and *Pdhal*), as well as on early-  
422 reactivated genes (*Abcb7* and *Atrx*). Strikingly, *Rnf12*, *Kif4* and *Pdhal* reactivation was  
423 always lower in the mutant E4.5 ICMs compared to controls (about 50% decrease in *Utx*  
424 mutants, Figure 5e). Furthermore, this decrease correlated well with the increase in  
425 H3K27me3 positive cells in mutants. On the other hand, *Abcb7* and *Atrx* gene reactivation  
426 rates did not appear to be affected in *Utx* knockout embryos. Thus early reactivated genes do  
427 not appear to be sensitive to the lack of UTX and increase of H3K27me3 in ICM cells,  
428 supporting their H3K27me3-independent reactivation mechanism, as suggested by their  
429 depletion in H3K27me3 (Figure 4c).

430 Finally, to exclude the possibility that the apparent interference with X-chromosome  
431 reactivation in the pre-epiblast cells might actually be due to delayed or abnormal  
432 development in *Utx* mutant embryos, leading to an increased proportion of pre-primitive  
433 endoderm cells, we stained for NANOG (Epi marker) and GATA6 (PrE marker) in both  
434 control and mutant E4.5 female ICMs (Figure 5f). No difference was seen in the total number  
435 of cells per ICM (with a mean of 38, 40 and 40 cells per ICM respectively for *Utx*<sup>FD/FD</sup>,  
436 *Utx*<sup>FDC/+</sup> and *Utx*<sup>FDC/FDC</sup>) and in the proportions of NANOG (epiblast) and GATA6-positive  
437 (primitive endoderm) cells. Thus, the absence of *Utx* and subsequent retention of H3K27  
438 methylation did not impact on ICM progression but does impair the efficiency of X-linked  
439 gene reactivation *in vivo*, at least for later reactivated genes. In summary, our results reveal  
440 the existence of different epigenetic memory states during imprinted X<sup>P</sup>CI, with some genes  
441 being sensitive to the requirement for *Utx* for removal of H3K27me3 and reactivation,  
442 whereas others can be reactivated independently of global *Xist* and H3K27me3 enrichment.

## 443 Discussion

444 Transcriptional reactivation of the paternal X-chromosome occurs in the mouse ICM during  
445 pre- to peri-implantation development. The extent and nature of this reprogramming process  
446 has remained poorly defined until now. Our single cell analysis of paternal X-chromosome  
447 reactivation in the ICM provides the first chromosome-wide map of X-linked gene activity  
448 and strong evidence for multiple mechanisms involved in the loss of silencing of X-linked  
449 genes. Emergence of ICM, at the blastocyst stage, is a key event during early mouse  
450 development. We now know that pluripotency factors such as Nanog will be retained in the  
451 epiblast precursor cells that will give rise to the embryo-proper and this is where Xp-  
452 reactivation occurs<sup>5,6,33</sup>. At the early blastocyst stage (E3.5), primitive endoderm and epiblast  
453 precursor cells only begin to segregate and heterogeneity in the expression of specific lineage  
454 markers is still seen (*e.g.* Nanog and Gata6), as confirmed in our study (Figure 3). This  
455 initially high degree of cell-to-cell variation in pluripotency and lineage factor gene  
456 expression (*eg* Nanog, Gata6) is lost by E4.0, when two transcriptionally distinct populations  
457 of cells can be observed. The pre-Epi cells are characterised by pluripotency genes and loss  
458 of *Xist* expression; PrE cells show *Xist* expression, decreased pluripotency gene expression  
459 and enhanced lineage markers such as Gata4 and Gata6.

460 Early work showed that imprinted X-chromosome inactivation remains in  
461 extraembryonic tissues, including the yolk sac derived from primitive endoderm cells<sup>3,4</sup> when  
462 Xp is reactivated in the pre-epiblast cells<sup>5,6</sup>. Previous studies have shown that loss of *Xist*  
463 RNA coating and H3K27me3 enrichment during X-chromosome reactivation was linked to  
464 pluripotency factors, such as Nanog and Prdm14<sup>15,16</sup>. The data we present here suggests that  
465 X-chromosome reactivation correlates with epiblast differentiation however reactivation of  
466 some genes is not limited to the future epiblast cells but initiates independently of lineage

467 segregation in early pre-implantation blastocysts. Indeed, our IF/RNA FISH and scRNAseq  
468 analysis at E3.5 ICMs suggests that X-linked gene reactivation can initiate before loss of Xist  
469 and H3K27me3 and before the strict emergence of PrE and Epi precursor cells (Figures 2 and  
470 4). This suggests that Xp chromosome reactivation and the pluripotency program can be  
471 uncoupled for some genes such as *Atrx* that are reactivated early on in almost all the cells of  
472 the E3.5 ICM. Importantly some of these early-reactivated genes then show Xp silencing  
473 again in E4.0 PrE. This implies a fluctuation in Xi status between E3.5 and E4.0, rather than a  
474 constant maintenance of Xp silencing, in future primitive endoderm cells (Figure 4d).  
475 Overall, our study highlights the distinct types of behaviour for different X-linked genes  
476 when it comes to X-chromosome reactivation. In the case of late-reactivated genes,  
477 reactivation is lineage-specific and restrained to the pre-Epi cells of the mid blastocyst  
478 onwards. Later gene reactivation shows a strong correlation with the presence of NANOG  
479 protein (Figure 2d) and with loss of Xist expression (Figure 4b) and H3K27me3 enrichment  
480 (Figure 2a). Moreover, loss of Xist RNA coating is the most predictive factor for biallelic  
481 expression of the late reactivated genes (Supplementary Figures 3c, 3d).

482 Our discovery that there are at least two different categories of X-linked genes in  
483 terms of their Xp reactivation behaviour is an important step in better understanding X-  
484 chromosome reactivation and epigenetic reprogramming in general. Interestingly, level of  
485 expression and genomic localization of X-linked genes are not obvious predictors of their  
486 reactivation behaviour (Supplementary Figure 2b and 2d). Our correlative analyses suggest  
487 that the dynamic presence of the Myc family of TFs might play a role in facilitating some  
488 early-reactivated genes to become re-expressed in ICM cells, but then revert to a silenced  
489 state in PrE cells (Supplementary Figure 1d and 1e). In the search for other TFs potentially  
490 involved in early X-linked gene reactivation, we used algorithms for motif discovery (see

491 Methods). No specific TF binding motif associated with escapees and early reactivated genes  
492 could be found with a high confidence. The lack of enrichment for known motifs could be  
493 due to the limited number of genes included in each of the reactivation classes. However,  
494 motif comparison analysis of any over-represented motifs in escapees and early-activated  
495 genes revealed a correspondence with the transcription factor YY1 (Ying Yang 1), (p-  
496 value=0.0002). This motif occurs 2.5 times more frequently in the group of escapees and  
497 early reactivated genes (n=20, 57 promoters), than in the group of late and very late genes  
498 (n=7, 49 promoters). YY1 is associated with escapees in human and has previously been  
499 described to be co-bound to the same binding sites as MYC in mouse ESCs<sup>42,43</sup>. The precise  
500 roles of the MYC proteins and YY1 in relation to Xp gene activity merits future exploration.

501 To better understand the degree to which epigenetic chromatin states might be  
502 involved in maintaining inactivity, we studied allele-specific H3K27me3 and H3K4me3  
503 enrichment (Figure 4c and Supplementary Figure 2e). Distinct patterns of differential  
504 enrichment of these histone marks was found for early-activated genes and escapees (high  
505 H3K4me3 on the Xp) and later-activated genes (high H3K27me3 on the Xp). These  
506 different epigenetic signatures might underlie the distinct transcriptional behaviours of those  
507 genes during Xp reactivation. One hypothesis could be that PRC2-component is not recruited  
508 to the early-activated genes, avoiding H3K27me3 enrichment at those loci, which could  
509 enable a quick response to transcription factors such as MYC family and/or YY1 in the early  
510 ICM.

511 On the other hand, the presence of the repressive mark H3K27me3 on the Xp may  
512 represent a memory mark that maintains silencing at least in the later reactivated genes. In  
513 support of this hypothesis, we show that erasure of H3K27me3 during X-chromosome  
514 reactivation is at least partly an active process, as it is delayed in the absence of the H3K27

515 demethylase, UTX, (Figure 5). The presence of some ICM cells with complete H3K27me3  
516 erasure in *Utx* knock-out could be explain by compensation by other demethylases such as  
517 JMJD3 and/or by passive loss of the repressive mark during cell division, however very few  
518 cell divisions occur between E3.5 and E4.5 in ICMs<sup>44</sup>. The interference with the kinetics of  
519 H3K27me3 loss on the Xp in *Utx* mutants correlates well with a decrease in efficiency of X-  
520 linked gene reactivation, for late reactivated genes such as *Rnf12* and *Kif4*, but not for the  
521 early-reactivated genes such as *Atrx* and *Abcb7*. This provides the first *in vivo* evidence that  
522 *Utx* may be involved in facilitating the Xp-reactivation process and provides important  
523 insight into the possible mechanisms involved in X-chromosome reactivation and epigenomic  
524 reprogramming in general.

525 In conclusion, our *in vivo* analysis of the process of Xp reactivation in the ICM  
526 reveals that different genes are reactivated by different mechanisms during ICM  
527 differentiation. Epigenetic memory of the silencing state involves H3K27me3 maintenance  
528 for some X-linked genes but not all. The reasons why some genes appear to resist full  
529 H3K27me3 during XCI and may thus be more prone to rapid reactivation, remain unknown.  
530 Interestingly, expression of several epigenetic modifiers appeared to correlate with X-  
531 chromosome reactivation (Supplementary Table 3 and Supplementary Figure 2g) such as  
532 Kdm3a, Kdm3b and Kdm3c (Jumonji C domain-containing protein that demethylates for  
533 H3K9 methylation), but also Kdm2b (H3K36-specific demethylase). MacroH2A is enriched  
534 on the inactive X chromosome<sup>10</sup> and its variants (H2afy and H2afy2) are expressed in ICM  
535 cells (data not shown). MacroH2A might repress X-linked gene reactivation, in a redundant  
536 fashion with H3K27me3 marks or specifically for some genes<sup>45</sup>. Future work will be required  
537 to determine whether reactivation of the Xp in the ICM also requires erasure of other  
538 chromatin marks such as H3K9me2 or MacroH2A. Our findings open up the way for a better

539 understanding of the *in vivo* requirements for epigenetic reprogramming in general.

540



541 **References**

- 542 1. Lyon, M. F. Gene action in the X-chromosome of the mouse (*Mus musculus* L.).  
543 *Nature* **190**, 372–3 (1961).
- 544 2. Okamoto, I. *et al.* Evidence for de novo imprinted X-chromosome inactivation  
545 independent of meiotic inactivation in mice. *Nature* **438**, 369–373 (2005).
- 546 3. Takagi, N. & Sasaki, M. Preferential inactivation of the paternally derived X  
547 chromosome in the extraembryonic membranes of the mouse. *Nature* **256**, 640–642  
548 (1975).
- 549 4. West, J. D., Frels, W. I. & Chapman, V. M. Expression of the Maternally X  
550 Chromosome in the Mouse Yolk Sac. *Cell* **12**, 873–882 (1977).
- 551 5. Okamoto, I., Otte, A. P., Allis, C. D., Reinberg, D. & Heard, E. Epigenetic dynamics  
552 of imprinted X inactivation during early mouse development. *Science* **303**, 644–9  
553 (2004).
- 554 6. Mak, W. *et al.* Reactivation of the paternal X chromosome in early mouse embryos.  
555 *Science* **303**, 666–9 (2004).
- 556 7. Borensztein, M. *et al.* Xist -dependent imprinted X inactivation and the early  
557 developmental consequences of its failure. *Nat. Struct. Mol. Biol.* **in press**, (2017).
- 558 8. Wang, F. *et al.* Regulation of X-linked gene expression during early mouse  
559 development by *Rlim*. *Elife* **5**, e19127 (2016).
- 560 9. Galupa, R. & Heard, E. X-chromosome inactivation: New insights into cis and trans  
561 regulation. *Curr. Opin. Genet. Dev.* **31**, 57–66 (2015).
- 562 10. Costanzi, C., Stein, P., Worrada, D. M., Schultz, R. M. & Pehrson, J. R. Histone  
563 macroH2A1 is concentrated in the inactive X chromosome of female preimplantation  
564 mouse embryos. *Development* **127**, 2283–2289 (2000).
- 565 11. Patrat, C. *et al.* Dynamic changes in paternal X-chromosome activity during imprinted  
566 X-chromosome inactivation in mice. *Proc. Natl. Acad. Sci. U. S. A.* **106**, 5198–203  
567 (2009).
- 568 12. Sado, T. *et al.* X inactivation in the mouse embryo deficient for *Dnmt1*: distinct effect  
569 of hypomethylation on imprinted and random X inactivation. *Dev. Biol.* **225**, 294–303  
570 (2000).
- 571 13. Hadjantonakis, A. K., Cox, L. L., Tam, P. P. L. & Nagy, A. An X-linked GFP  
572 transgene reveals unexpected paternal X-chromosome activity in trophoblastic giant

- 573 cells of the mouse placenta. *Genesis* **29**, 133–140 (2001).
- 574 14. Corbel, C., Diabangouaya, P., Gendrel, A.-V., Chow, J. C. & Heard, E. Unusual  
575 chromatin status and organization of the inactive X chromosome in murine trophoblast  
576 giant cells. *Development* **140**, 861–872 (2013).
- 577 15. Navarro, P. *et al.* Molecular coupling of Xist regulation and pluripotency. *Science* **321**,  
578 1693–5 (2008).
- 579 16. Payer, B. *et al.* Tsix RNA and the Germline Factor, PRDM14, Link X Reactivation  
580 and Stem Cell Reprogramming. *Mol. Cell* **52**, 1–14 (2013).
- 581 17. Pasque, V. *et al.* X chromosome reactivation dynamics reveal stages of reprogramming  
582 to pluripotency. *Cell* **159**, 1681–1697 (2014).
- 583 18. Williams, L. H., Kalantry, S., Starmer, J. & Magnuson, T. Transcription precedes loss  
584 of Xist coating and depletion of H3K27me3 during X-chromosome reprogramming in  
585 the mouse inner cell mass. *Development* **138**, 2049–57 (2011).
- 586 19. Hajkova, P. *et al.* Chromatin dynamics during epigenetic reprogramming in the mouse  
587 germ line. *Nature* **452**, 877–81 (2008).
- 588 20. Hong, S. *et al.* Identification of JmjC domain-containing UTX and JMJD3 as histone  
589 H3 lysine 27 demethylases. *Proc. Natl. Acad. Sci. U. S. A.* **104**, 18439–44 (2007).
- 590 21. Agger, K. *et al.* UTX and JMJD3 are histone H3K27 demethylases involved in HOX  
591 gene regulation and development. *Nature* **449**, 731–734 (2007).
- 592 22. Lan, F. *et al.* A histone H3 lysine 27 demethylase regulates animal posterior  
593 development. *Nature* **449**, 689–694 (2007).
- 594 23. Shpargel, K. B., Sengoku, T., Yokoyama, S. & Magnuson, T. UTX and UTY  
595 demonstrate histone demethylase-independent function in mouse embryonic  
596 development. *PLoS Genet.* **8**, e1002964 (2012).
- 597 24. Mansour, A. A. *et al.* The H3K27 demethylase Utx regulates somatic and germ cell  
598 epigenetic reprogramming. *Nature* **488**, 409–13 (2012).
- 599 25. Yang, L. *et al.* The Maternal Effect Genes UTX and JMJD3 Play Contrasting Roles in  
600 *Mus musculus* Preimplantation Embryo Development. *Sci. Rep.* **6**, 26711 (2016).
- 601 26. Zhao, W. *et al.* Jmjd3 inhibits reprogramming by upregulating expression of  
602 INK4a/Arf and targeting PHF20 for ubiquitination. *Cell* **152**, 1037–1050 (2013).
- 603 27. Morales Torres, C., Laugesen, A. & Helin, K. Utx is required for proper induction of  
604 ectoderm and mesoderm during differentiation of embryonic stem cells. *PLoS One* **8**,

- 605 e60020 (2013).
- 606 28. Greenfield, a *et al.* The UTX gene escapes X inactivation in mice and humans. *Hum.*  
607 *Mol. Genet.* **7**, 737–42 (1998).
- 608 29. Wang, C. *et al.* UTX regulates mesoderm differentiation of embryonic stem cells  
609 independent of H3K27 demethylase activity. *Proc. Natl. Acad. Sci. U. S. A.* **109**,  
610 15324–9 (2012).
- 611 30. Thieme, S. *et al.* The histone demethylase UTX regulates stem cell migration and  
612 hematopoiesis Regular Article The histone demethylase UTX regulates stem cell  
613 migration and hematopoiesis. *Blood* **121**, 2462–2473 (2013).
- 614 31. Deng, Q., Ramskold, D., Reinus, B. & Sandberg, R. Single-Cell RNA-Seq Reveals  
615 Dynamic, Random Monoallelic Gene Expression in Mammalian Cells. *Science (80-. )*.  
616 **343**, 193–196 (2014).
- 617 32. Plusa, B., Piliszek, A., Frankenberg, S., Artus, J. & Hadjantonakis, A.-K. Distinct  
618 sequential cell behaviours direct primitive endoderm formation in the mouse  
619 blastocyst. *Development* **135**, 3081–3091 (2008).
- 620 33. Chazaud, C., Yamanaka, Y., Pawson, T. & Rossant, J. Early Lineage Segregation  
621 between Epiblast and Primitive Endoderm in Mouse Blastocysts through the Grb2-  
622 MAPK Pathway. *Dev. Cell* **10**, 615–624 (2006).
- 623 34. Ohnishi, Y. *et al.* Cell-to-cell expression variability followed by signal reinforcement  
624 progressively segregates early mouse lineages. *Nat. Cell Biol.* **16**, 27–37 (2014).
- 625 35. Boroviak, T. *et al.* Lineage-Specific Profiling Delineates the Emergence and  
626 Progression of Naive Pluripotency in Mammalian Embryogenesis. *Dev. Cell* **35**, 366–  
627 382 (2015).
- 628 36. Tang, F. *et al.* RNA-Seq analysis to capture the transcriptome landscape of a single  
629 cell. *Nat. Protoc.* **5**, 516–35 (2010).
- 630 37. Engreitz, J. M. *et al.* The Xist lncRNA exploits three-dimensional genome architecture  
631 to spread across the X chromosome. *Science* **341**, 1237973 (2013).
- 632 38. Zheng, H. *et al.* Resetting Epigenetic Memory by Reprogramming of Histone  
633 Modifications in Mammals. *Mol. Cell* **63**, 1066–1079 (2016).
- 634 39. Chen, X. *et al.* Integration of External Signaling Pathways with the Core  
635 Transcriptional Network in Embryonic Stem Cells. *Cell* **133**, 1106–1117 (2008).
- 636 40. Ma, Z., Swigut, T., Valouev, A., Rada-Iglesias, A. & Wysocka, J. Sequence-specific

- 637 regulator Prdm14 safeguards mouse ESCs from entering extraembryonic endoderm  
638 fates. *Nat. Struct. & Mol. Biol.* **18**, 120–127 (2011).
- 639 41. Percharde, M., Bulut-Karslioglu, A. & Ramalho-Santos, M. Hypertranscription in  
640 Development, Stem Cells, and Regeneration. *Dev. Cell* (2016).  
641 doi:10.1016/j.devcel.2016.11.010
- 642 42. Vella, P., Barozzi, I., Cuomo, A., Bonaldi, T. & Pasini, D. Yin Yang 1 extends the  
643 Myc-related transcription factors network in embryonic stem cells. *Nucleic Acids Res.*  
644 **40**, 3403–3418 (2012).
- 645 43. Chen, C.-Y. *et al.* YY1 binding association with sex-biased transcription revealed  
646 through X-linked transcript levels and allelic binding analyses. *Sci. Rep.* 1–14 (2016).  
647 doi:10.1038/srep37324
- 648 44. Handyside, A. H. & Hunter, S. Cell division and death in the mouse blastocyst before  
649 implantation. *Roux's Arch. Dev. Biol.* 519–526 (1986).
- 650 45. Gaspar-maia, A. *et al.* MacroH2A histone variants act as a barrier upon  
651 reprogramming towards pluripotency. *Nat. Commun.* (2013).  
652 doi:10.1038/ncomms2582.MacroH2A
- 653 46. Lan, Z. J., Xu, X. & Cooney, A. J. Differential oocyte-specific expression of Cre  
654 recombinase activity in GDF-9-iCre, Zp3cre, and Msx2Cre transgenic mice. *Biol*  
655 *Reprod* **71**, 1469–1474 (2004).
- 656 47. Matsui, J., Goto, Y. & Takagi, N. Control of Xist expression for imprinted and random  
657 X chromosome inactivation in mice. *Hum. Mol. Genet.* **10**, 1393–1401 (2001).
- 658 48. Ancelin, K. *et al.* Maternal LSD1/KDM1A is an essential regulator of chromatin and  
659 transcription landscapes during zygotic genome activation. *Elife* **5**, (2016).
- 660 49. Rozowsky, J. *et al.* AlleleSeq: analysis of allele-specific expression and binding in a  
661 network framework. *Mol. Syst. Biol.* **7**, 522 (2011).
- 662 50. Kim, D. *et al.* TopHat2: accurate alignment of transcriptomes in the presence of  
663 insertions, deletions and gene fusions. *Genome Biol.* **14**, R36 (2013).
- 664 51. Krueger, F., Andrews, S. R., Krueger, F. & Andrews, S. R. SNPsplit: Allele-specific  
665 splitting of alignments between genomes with known SNP genotypes. *F1000Research*  
666 **5**, 1479 (2016).
- 667 52. Ashburner, M. *et al.* Gene Ontology: tool for the unification of biology. *Nat. Genet.*  
668 **25**, 25–29 (2000).

- 669 53. Carbon, S. *et al.* AmiGO: Online access to ontology and annotation data.  
670 *Bioinformatics* **25**, 288–289 (2009).
- 671 54. Medina-rivera, A. *et al.* RSAT 2015 : Regulatory Sequence Analysis Tools. *Nucleic*  
672 *Acids Res.* **43**, 50–56 (2015).
- 673 55. Bailey, T. L. *et al.* MEME Suite : tools for motif discovery and searching. *Nucleic*  
674 *Acids Res.* **37**, 202–208 (2009).
- 675

## 676 **Methods**

677

### 678 **Mouse crosses and collection of embryos**

679 All experimental designs and procedures were in agreement with the guidelines from French  
680 and German legislations and institutional policies.

681 Mice were exposed to light daily between 7:00 AM and 7:00 PM. Noon on the day of the  
682 plug is considered as E0.5. For Figures 1 and 2, embryos were obtained by natural matings  
683 between B6D2F1 (derived from C57BL/6J and DBA2 crosses) females (5-10 weeks old) and  
684 males. For the scRNAseq experiments, hybrid embryos were derived from natural matings  
685 between C57BL/6J (B6) females (5-10 weeks old) crossed with CAST/EiJ (Cast) males.

686 To study the absence of *Utx* in early embryos, females mice carrying heterozygous or  
687 homozygous conditional *Utx* alleles ( $Utx^{FD}$ , described in Thieme et al., 2014<sup>30</sup>) and a Cre-  
688 driven by *GDF-9* promoter (*GDF9-iCre*, described in Lan et al., 2004<sup>46</sup>) have been crossed  
689 with  $Utx^{FDC/Y}$  males ( $Utx^{-/Y}$ ). *Utx* control female embryos ( $Utx^{FDC/wt}$  and  $Utx^{FD/FD}$ ) have been  
690 obtained either from the same litters as mutants (from  $Utx^{FD/wt}$ , *GDF-9iCre* females) or after  
691 matings between  $Utx^{FD/FD}$  females with  $Utx^{FD/Y}$  males.

692 All embryos were harvested between pre-implantation to peri-implantation stages,  
693 respectively between E3.25 to E4.5. Embryos have been classified into early (E3.25-E3.5),  
694 mid (E3.75-E4.0) and late (E4.25-E4.5) blastocyst accordingly to morphology, timing and  
695 number of cells per ICM (respectively n=10-25, n=20-40 and n=30-55 cells per ICM).

696

### 697 **Immunosurgery for isolation of the inner cell mass**

698 Pre-implantation blastocyst embryos at stages up to E3.5 (E4.0 for hybrid embryos) were  
699 recovered by flushing the uterus with M2 medium (Sigma). Embryos at E3.75 and later were  
700 dissected out from the uterus. The embryos were staged on the basis of their morphology and

701 number of cells per ICM.

702 When applicable, the zona pellucida was removed using acid Tyrode's solution (Sigma), and  
703 embryos were washed twice with M2 medium (Sigma). Inner Cell Mass (ICM) was then  
704 isolated from all stage blastocysts by immunosurgery as previously described<sup>47</sup>.

705

#### 706 **RNA Fluorescent In Situ Hybridization**

707 RNA FISH on blastocysts was performed as previously described<sup>11</sup> using the exon and  
708 intron-spanning plasmid probe p510 for *Xist* (and its antisense *Tsix*) and BAC/Fosmid probes  
709 for genes as described in Supplementary Table 3. Images were acquired using Inverted laser  
710 scanning confocal microscope with spectral detection (LSM700 - Zeiss) equipped with a  
711 260nm laser (RappOpto), with a 60X objective and 0.2  $\mu\text{m}$  Z-sections or a 200M Axiovert  
712 fluorescence microscope (Zeiss) equippe with an ApoTome was used to generate 3D optical  
713 sections. Sequential z-axis images were collected in 0.3  $\mu\text{m}$  steps. ICM obtained from  
714 *Utx*<sup>FDC/wt</sup> females have been PCR-genotyped after image acquisition (details available upon  
715 request).

716

#### 717 **Immunofluorescence staining**

718 Immunofluorescence was essentially carried out as described<sup>48</sup> previously with an additional  
719 step of blocking in 3% FCS before the primary antibody incubation. All the antibodies used  
720 in this study are listed in Supplementary Table 3 along with the information on dilution  
721 ratios. Images were acquired using Inverted laser scanning confocal microscope with spectral  
722 detection (LSM700 - Zeiss) equipped with a 260nm laser (RappOpto), with a 60X objective  
723 and 0.2  $\mu\text{m}$  Z-sections. Maximum projections were performed with Image J software (Fiji,  
724 NIH).

725

726 **Immunofluorescence combined with RNA Fluorescent In Situ Hybridization**

727 Immunofluorescence followed by RNA-FISH were carried out as described previously<sup>5</sup>.  
728 Images were acquired using Inverted laser scanning confocal microscope with spectral  
729 detection (LSM700 - Zeiss) equipped with a 260nm laser (RappOpto), with a 60X objective  
730 and 0.2  $\mu\text{m}$  Z-sections or a confocal wide-field Deltavision core microscope (Applied  
731 Precision – GE Healthcare) with a 60 $\times$  objective (1,42 oil PL APO N) and 0.2  $\mu\text{m}$  Z-sections  
732 or a 200M Axiovert fluorescence microscope (Zeiss) equipped with an ApoTome was used to  
733 generate 3D optical sections. Sequential z-axis images were collected in 0.3  $\mu\text{m}$  steps. Images  
734 were analysed using ImageJ software (Fiji, NIH).

735 ICMs obtained from *Utx*<sup>FDC/wt</sup> females were PCR-genotyped after image acquisition (details  
736 available upon request).

737 All the antibodies and probes used in this study are listed in Supplementary Table 3 along  
738 with the information on dilution ratios.

739

740 **Single cell dissociation from pre-implantation to peri-implantation blastocyst stage**  
741 **embryos.**

742 To isolate individual cells, we incubated the ICM in TrypLE solution for 5 minutes  
743 (Invitrogen). After incubation, each blastomere was mechanically dissociated by mouth  
744 pipetting with a thin glass capillary. Single cells were then washed 3 times in PBS/acetylated  
745 BSA (Sigma) before being manually picked into PCR tubes with a minimum amount of  
746 liquid. We either directly prepared the cDNA amplification or kept the single cells at -80°C  
747 for future preparation.

748

749 **Single cell RNA amplification:**



750 PolyA<sup>+</sup> mRNA extracted from each single cell was reverse transcribed from the 3'UTR and  
751 amplified following the *Tang et al* protocol<sup>36</sup>. Care was taken to process only embryos and  
752 single blastomeres of the highest quality based on morphology, number of cells and on  
753 amplification yield (Supplementary Table 1). Additionnal RT-specific primer for Xist  
754 amplification have been added in the lysis buffer, which contains 100nM universal RT-  
755 primer UP1 and 15nM Xist-specific RT primer ES323  
756 (ATATGGATCCGGCGCGCCGTCGAC(T)<sub>24</sub> GCAAGGAAGACAGACACACAAAGCA).  
757 Published scRNAseq samples of E3.5 trophectoderm and ICM from the same interspecific  
758 cross and the reverse cross and amplified following the same method have been added to our  
759 analysis (GSE80810; Borensztein et al., 2017<sup>7</sup>).

760

#### 761 **Single cell libraries and deep-sequencing**

762 After single cell amplification, each single cell gender has been analysed by qPCR for *Xist*  
763 and Y-linked genes *Eif2s3y*, *Uty* and *Ddx3y*. Single-cell libraries were prepared from 34  
764 females samples, which have passed quality controls according to the manufacturer's  
765 protocol (Illumina) and were deeply sequenced on an Illumina HiSeq 2500 instruments in  
766 single-end 50bp reads (Supplementary Table 1).

767

#### 768 **Quality control and filtering of raw data**

769 Quality control was applied on raw data as already described in Borensztein et al., 2017<sup>7</sup>.  
770 Sequencing reads characterized by at least one of the following criteria were discarded from  
771 the analysis:

772 1. More than 50% of low quality bases (Phred score <5).

773 2. More than 5% of N bases.

774 3. At least 80% of AT rate.

775 4. More than 30% (15 bases) of continuous A and/or T.

776

#### 777 **Estimation of gene expression levels.**

778 RNA reverse transcription allowed sequencing only up to an average of 3 kb from the 3'  
779 UTR. To estimate transcript abundance, read counts were thus normalized on the basis of the  
780 amplification size of each transcript (retrotranscribed length per million mapped reads,  
781 RPRT) rather than on the basis of the size of each gene (RPKM), as described in Borensztein  
782 et al., 2017<sup>7</sup>. To avoid noise due to single cell RNAseq amplification technique, only well-  
783 expressed genes (RPRT>4) were considered in our allele-specific study. A threshold of  
784 RPRT>1 was applied to consider a gene as expressed (Figures 3, 4 and Supplementary  
785 Figures 3 and 4).”

786

#### 787 **Allele-specific RNA-seq pipeline**

788 Allele-specific RNA-seq analysis pipeline described in Borensztein et al., 2017<sup>7</sup> was applied  
789 to our data, using the same parameters, parental genomes, annotations and SNPs files.  
790 Briefly, we have filtered the SNPs on their quality values (F1 values) thanks to SNPsplit tool  
791 (v0.3.0)<sup>49</sup> and SNP on chr:X 37,805,131 (mm10) in *Rhox5* gene, annotated A for C57BL/6J  
792 and G for all other strains (included C57BL/6NJ) was discarded because missing in our  
793 samples. After reconstruction of both maternal (C57BL/6J) and paternal (Castaneus) genome,  
794 allele-specific read alignment was performed with TopHat2 (v2.1.0)<sup>50</sup> software. The  
795 SAMtools mpileup utility (v1.1)<sup>51</sup> was then used to extract base-pair information at each  
796 genomic position. At each SNP position, the numbers of paternal and maternal alleles were  
797 counted. The threshold used to call a gene informative was five reads mapped per single  
798 SNP, with a minimum of eight reads mapped on SNPs per gene, to minimize disparity with

799 low-polymorphic genes. The allele-specific origin of the transcripts (or allelic ratio) was  
800 measured as the total number of reads mapped on the paternal genome divided by the total  
801 number of paternal and maternal reads for each gene: allelic ratio = paternal reads/(paternal +  
802 maternal) reads.

803 Genes were thus classified into two categories:

804 1. Monoallelically expressed genes: allelic-ratio value  $\leq 0.15$  or  $\geq 0.85$ .

805 2. Biallelically expressed genes: allelic-ratio value  $>0.15$  or  $<0.85$ .

806

### 807 **Principal component analysis, hierarchical clustering and lineage analysis**

808 Gene count tables were generated using HTSeq software (v0.6.1). Rlog function from  
809 DESeq2 R-package (v1.12.2) was used to normalize the raw counts data, with filter  
810 thresholds as described<sup>7</sup>. To identify the cell-origin of our samples, PCA and hierarchical  
811 clustering (Pearson correlation – Ward method) on normalised data of 23 lineage-specific  
812 factors (Figure 3) were performed using plotPCA function from DESeq2 R-package and  
813 hclust function implemented in the gplots R-package (v3.0.1) respectively.

814

### 815 **Heatmap of the X-chromosome**

816 As described in Borensztein et al, 2017<sup>7</sup>, data from informative genes were analysed if the  
817 gene was expressed (RPRT $>4$ ) in at least 25% of the single cells (with a minimum of 2 cells  
818 except for TE) in a particular developmental stage. To follow reactivation, we decided to  
819 focus on genes at least expressed in both PrE and Epi lineages at E4.0 stage. Mean of the  
820 allelic ratio of each gene is represented for the different stages. A value has been given only if  
821 the gene was reaching the threshold described previously. Same list of genes was used for all  
822 heatmaps (116 genes). Only single cell from the same interspecific cross have been used

823 (C57BL/6J (B6) females x CAST/EiJ (Cast) males) as different genes could follow different  
824 kinetics in a strain-specific manner<sup>7</sup>.

825

### 826 **Definition of the timing of reactivation**

827 A minimum of 20% of expression from the Xp has been used as a threshold to call a gene as  
828 reactivated in the female samples. Adapting the method used in Borensztein et al., 2017<sup>7</sup>, we  
829 have automatically associated X-linked genes that become biallelic in the ICM at E3.5 (allelic  
830 ratio  $\leq 0.15$  in TE or inactivated at the same stage in Borensztein et al., 2017<sup>7</sup> and  $> 0.20$  in  
831 ICM at E3.5) stage to early-reactivated gene class and in the epiblast at E4.0 stage to late-  
832 reactivated gene class (allelic ratio equals NA or  $\leq 0.15$  in TE, NA or  $\leq 0.20$  in ICM at E3.5  
833 and  $> 0.20$  in epiblast at E4.0). X-linked genes showing very late-reactivation ( $0.15 \leq$  allelic  
834 ratio in TE at E3.5 and  $0.2 \leq$  allelic ratio in other stages) in all stages are categorized as not  
835 yet reactivated genes. Finally, the last group represents genes that are escaping imprinted Xp  
836 inactivation (allelic ratio  $> 0.15$  in all stages, or NA at E3.5 and allelic ratio  $> 0.15$  in the other  
837 stages). Some genes could not be associated to a gene class due to several missing values in  
838 the decisive stages, however classes have been associated to them if RNA-FISH data was  
839 available or in case of imprinted genes (eg *Xlr3a* and *Xist* classed as “others”).

840

### 841 **Correlation between autosomal and X-linked gene expression**

842 Correlation and anti-correlation between gene expression levels (autosomes and X  
843 chromosomes) and percentage of X-linked gene reactivation (allelic ratio  $> 0.2$  for X-linked  
844 genes) was measured by Pearson correlation and Benjamini-Hochberg correction and are  
845 provided in Supplementary Table 3. BC and CB (only for E3.5 trophectoderm) female single  
846 cells have been used in this analysis.

847 Gene ontology has been made for the top correlated genes (q-value<0.05) with the Gene  
848 Ontology Project<sup>52</sup> and AMigo software<sup>53</sup>.

849

### 850 **Allele-specific H3K27me3 and H3K4me3 ChIPseq analysis**

851 H3K27me3 and H3K4me3 enrichments in ICM were taken from Zheng et al., Mol Cell  
852 2016<sup>38</sup>. Bed files of either Maternal or Paternal chromosomes for both marks were used to  
853 assess the enrichment of either marks at 5kb around their TSS. For genes having several TSS,  
854 position of start (for gene on the + strand) or end (for genes on the – strand) of the gene were  
855 taken. Score for each 100pb window containing enriched marks were sum (by Custom R  
856 scripts {R Core Team (2015). R: A language and environment for statistical computing. R  
857 Foundation for Statistical Computing, Vienna, Austria. URL <https://www.R-project.org/>}).  
858 For genes whose length was below 5kb, gene size was taken as window. (Distribution of gene  
859 size for each group was not significantly different, data not shown).

860

### 861 **Transcription factor binding sites analysis**

862 Nanog, Oct4, Sox2, Myc, Mycn, Klf4, Esrrb and Tcfcp2l1 binding sites from ChIPseq  
863 experiments in mouse ESCs were taken from Chen et al., Mol Cell 2008<sup>39</sup>. Prdm14 binding  
864 sites in mESCs were taken from Ma et al., NSMB 2011<sup>40</sup>. The number of binding sites of  
865 each factor in promoter, gene body and until 3kb upstream of the TSS was calculated for each  
866 gene of the reactivation-timing list (Supplementary Table 2).

867

### 868 **Motif discovery analysis**

869 RSAT oligo-analysis<sup>54</sup> was used to search for over-represented motifs in promoters (-  
870 700/+299nts relative to TSS) of X-linked genes in escapees, early, late and very late  
871 reactivation classes. Since the number of genes per class is too low to obtain high confidence

872 results, we pooled genes by similar behaviour, with escapees and early reactivated genes in  
873 one group and late and very late in another one. One non-repetitive motif was found over-  
874 represented in the first group. This motif was compared to a database of known TF motifs  
875 using Tomtom (MEME Suite)<sup>55</sup> and only one correspondence was found with E-value<1, that  
876 of the TF YY1 motif (p-value=0.0002, E-value=0.27, q-value=0.54). FIMO (MEME Suite)<sup>55</sup>  
877 was used to determine the occurrences of this motif in each group of genes, and only matches  
878 with a p-value < 0.0001 were considered.

879

### 880 **Statistics section**

881 Kruskal-Wallis and Post-hoc test were used to analyse non-parametric and unrelated samples.  
882 The statistical significance has been evaluated through two-sided Dunn's Multiple  
883 Comparison Test with Benjamini-Hochberg correction and Kruskal-Wallis analysis of  
884 variance. p-values are provided in the figures, figure legends and/or main text. Enrichment of  
885 histone marks has been evaluated thanks to non-parametric Wilcoxon test.

886

### 887 **Data access**

888 The Gene Expression Omnibus (GEO) accession numbers for the data sets reported in this  
889 paper are GSE89900 and GSE80810.

890

### 891 **Acknowledgements**

892 We are grateful to P. Gestraud for help in statistical analysis. We thank the pathogen-free  
893 barrier animal facility and the Cell and Tissue Imaging Platform - PICT-IBiSA (member of  
894 France-Bioimaging) of Institut Curie. We acknowledge C.A. Penfold and the members of  
895 E.H. and A.S. laboratories for feedbacks and critical inputs. This work was funded by  
896 fellowships from Région Ile-de-France (DIM STEMPOLE), Fondation Recherche Médicale

897 (FRM SPE20150331826) and a Marie Sklodowska-Curie Individual Fellowship (H2020-  
898 MSCA-IF-2015 - No. 706144) to M.B., CELLECTCHIP (ANR-14-CE10-0013) to E.H. and  
899 M.B, the Paris Alliance of Cancer Research Institutes (PACRI-ANR) to L.S., ERC Advanced  
900 Investigator award (ERC-2010-AdG – No. 250367), EU FP7 grants SYBOSS (EU 7th  
901 Framework G.A. no. 242129), MODHEP (EU 7th Framework G.A. no. 259743), La Ligue,  
902 Fondation de France, Labex DEEP (ANR-11-LBX-0044) part of the IDEX Idex PSL (ANR-  
903 10-IDEX-0001-02 PSL) and ABS4NGS (ANR-11-BINF-0001) to E.H, France Genomique  
904 National infrastructure (ANR-10-INBS-09) to E.H., NS, E.B., a grant-in-aid from MEXT and  
905 JST-ERATO to I.O., M.S. and a DFG grant (SPP1356) to K.A..

906

#### 907 **Author Contributions**

908 I.O., M.B. and E.H. conceived the study, with input from M.S., A.S and K.Anastassiadis.  
909 I.O., M.B. and K.Anastassiadis performed most of the IF/RNA-FISH experiments.  
910 K.Anastassiadis performed the IF experiments. C.P., P.D. and K. Ancelin helped for IF/RNA-  
911 FISH experiments and acquisition. M.B. performed single cell RNA amplification and C-J.C.  
912 performed the transcriptome library preparation and sequencing. L.S. and M.B. analysed the  
913 scRNAseq data and bioinformatics was supervised by NS and EB. G.G. and R.G. performed  
914 respectively the ChIPseq and the motif discovery analysis. M.B., I.O. and E.H. wrote the  
915 paper with input from all co-authors.

916

#### 917 **Author Information**

918 ScRNAseq data produced for this analysis are deposited in Gene Expression Omnibus under  
919 accession numbers GSE89900.

920 The authors declare no competing financial interests.

921

922 Correspondence and requests for material should be addressed to E.H. ([edith.heard@curie.fr](mailto:edith.heard@curie.fr)).

923

924



925 **Figure Legends**

926

927 **Figure 1**

928 **Xist RNA and H3K27me3 profiles in the ICM cells of early and mid blastocysts.**

929 **(a)** Examples of individual ICM of early (E3.5) and mid (E4.0) implantation stage embryos  
930 (photographs, scale bar 20 $\mu$ m) analysed by immunolabelling with antibodies against H3K27  
931 tri-methylation (red) combined with Xist RNA FISH (green). For each stage, an intact ICM  
932 (IF/RNA FISH) and an enlarged nucleus are shown (scale bar, 10 $\mu$ m). The cells below the  
933 white line illustrate the cluster of cells that have lost Xist RNA coating and H3K27me3  
934 enrichment on the Xp and are presumably the epiblast.

935 **(b)** Proportion of ICM cells showing enrichment of H3K27me3 on the Xist RNA coated X  
936 chromosome in early and mid blastocyst stages are presented as mean. (right panel). Below  
937 the graph the total cell number analysed is indicated, followed by the total number of female  
938 embryos analysed in brackets.

939 ICM, inner cell mass; RNA FISH, RNA-Fluorescent In Situ Hybridization; IF, Immuno  
940 Fluorescence.

941

942 **Figure 2**

943 **Xist RNA, X-linked gene expression and H3K27me3 profiles in the ICM cells of early to**  
944 **late blastocyst stage embryos.**

945 **(a)** Examples of individual ICM analysed by immunolabelling with antibodies against  
946 H3K27 tri-methylation (greyscale) and combined with RNA FISH for Xist RNA (green) and  
947 primary transcription from the X-linked genes (red), together with representative nucleus are  
948 shown (scale bar, 10µm).

949 **(b)** Schematic representation of the X chromosome showing the location of the loci analysed  
950 in the panel **(a)** and **(c)**. *Atp6ap2* gene is known to escape XCI in 60% to 80% of blastocyst  
951 cells<sup>11</sup> and used as a control of the experiment.

952 **(c)** Percentage (mean) of cells showing biallelic expression for X-linked genes in ICM of  
953 independent early (E3.5), mid (E4.0) and late (E4.5) blastocyst stage embryos.

954 **(d)** Examples of individual ICM analysed by immunolabelling with NANOG (greyscale),  
955 combined with RNA FISH for Xist (green) and X-linked genes (*Atp7a* and *Kif4*) (red) at  
956 early (E3.5) and mid (E3.75) blastocyst stage embryos. For each stage, an intact ICM  
957 (IF/RNA FISH) and enlarged nuclei (white squares) are shown. Dotted lines indicate the  
958 position of NANOG-positive cells (scale bar, 10µm).

959 **(e)** Proportion (mean) of NANOG-positive ICM cells showing different Xist and X-linked  
960 gene expression patterns at early (E3.5) and mid (E3.75) blastocyst stage embryos. Below the  
961 graph the total cell number analysed is indicated, followed by the total number of female  
962 embryos analysed in brackets.

963 **(f)** Proportion (mean) of NANOG-negative ICM cells showing different *Xist* and X-linked  
964 gene expression patterns at early (E3.5) and mid (E3.75) blastocyst stage embryos. Below the  
965 graph the total cell number analysed is indicated, followed by the total number of female

966 embryos analysed in brackets.

967

968 **Figure 3**

969 **Single cell RNAseq reveals loss of heterogeneity in the E4.0 mid ICM compared to early**  
970 **E3.5 ICM.**

971 Principal component analysis (PCA) based on scRNAseq data from trophectoderm (E3.5),  
972 early (E3.5, 10-25 cells/ICM) and mid (E4.0, 20-40 cells/ICM) ICM cells on the 1,000 most  
973 variable genes **(a)** and on published pluripotency and differentiation candidate genes (n=23,  
974 list in Figure 3c) **(b)**. Different stages are designed by different colours. n= 14, 23 and 5 cells,  
975 respectively for E3.5 ICM, E4.0 ICM and E3.5 TE (details of each single cell is listed in  
976 Supplementary Table 1).

977 **(c)** Hierarchical clustering (top) and Pearson distance (bottom) of pluripotency and lineage  
978 genes (listed in Figure 3d) expression variation in E3.5 and E4.0 single cells, based on  
979 Pearson's correlation. Cells were clustered by lineage (TE, PrE and Epi), then by stage. n=42  
980 single cell samples.

981 TE, Trophectoderm; PrE, Primitive Endoderm; ICM, Inner cell mass; Epi, Epiblast.

982 **(d)** Level of expression of the 23 candidate genes involved in pluripotency and lineage  
983 differentiation in the 42 single cell samples and used to classify cells according to their  
984 lineage are shown. Cells were ordered according to the hierarchical clustering in Figure 3c.

985 TE, Trophectoderm; PrE, Primitive Endoderm; ICM, Inner cell mass; Epi, Epiblast.

986

987 **Figure 4**

988 **Different stages of X-linked gene reactivation in the ICM**

989 **(a)** The mean of allele-specific expression ratios for each informative and expressed X-linked  
990 gene in E3.5 (Trophectoderm and ICM) and E4.0 (Primitive Endoderm and Epiblast) female  
991 B6xCast embryos are represented as heatmaps, with strictly maternal expression (ratio  $\leq 0.15$ )  
992 in red and strictly paternal expression (ratio  $\geq 0.85$ ) in blue. Colour gradients are used in  
993 between these two values as shown in the key. Genes are ordered by genomic position (left)  
994 or by timing of reactivation (right). Further information is provided in Supplementary Table 2  
995 and Methods. Blue, red and black arrows are respectively highlighting example of early, later  
996 reactivated genes and escapees. As expected, *Xist* RNA is paternally expressed in the  
997 trophoctoderm cells. *Ogt* and *Yipf6* genes display similar paternal expression in the  
998 trophoctoderm, escape imprinted XCI, and show random monoallelic expression and  
999 Castaneus bias respectively (Supplementary Figure 1)<sup>7</sup>. n= 116 genes.

1000 **(b)** Anti-correlation is shown between the level of *Xist* expression and the number of  
1001 biallelically/reactivated and informative X-linked genes in scRNAseq (Spearman  
1002 correlation). Male E3.5 single cells have been added and used as control for *Xist* expression  
1003 and X-linked gene parental expression. Genes with level of expression as (RPRT<1) are  
1004 considered as non-expressed in our samples.

1005 **(c)** Enrichment of H3K27me3 and H3K4me3 on paternal X chromosome obtained from  
1006 (Zheng et al., 2016)<sup>38</sup> shows significant differences (by Wilcoxon test) between Early and  
1007 Escapee reactivation-timing classes compared to Late and Very Late. Low cell ChIPseq have  
1008 been performed with ICM cells of pre-implantation embryos (pooled between E3.5-E4.0)  
1009 after immunosurgery of the ICM<sup>38</sup>. Activated genes show an excess of H3K4me3 and  
1010 repressed ones an enrichment of H3K27me3. *Xist* is highlighted with an orange arrow. Early

1011 versus Late ( $p=2.29*10^{-4}$  for H3K27me3 and  $p=1.63*10^{-3}$  for H3K4me3) and Very late  
1012 ( $p=2.51*10^{-2}$  for H3K27me3 and  $p=3.95*10^{-4}$  for H3K4me3) and Escapees versus Late  
1013 ( $p=1.95*10^{-6}$  for H3K27me3 and  $p=2.09*10^{-7}$  for H3K4me3) and Very late ( $p=7.33*10^{-3}$  for  
1014 H3K27me3 and  $p=6.73*10^{-8}$  for H3K4me3).

1015 **(d)** Scheme of imprinted XCI, followed by reactivation in the inner cell mass of the  
1016 blastocyst. Xp silencing is triggered by the long non-coding Xist RNA, followed by  
1017 H3K27me3 recruitment. At the early blastocyst stage (E3.5), imprinted Xp is maintained in  
1018 TE, when some genes are already showing reactivation in the ICM, independently of Xist  
1019 (early reactivated genes). Those early genes are lowly enriched in H3K27me3 marks and  
1020 highly enriched in H3K4me3 on their paternal allele compared to the later reactivated ones.  
1021 Few hours later, when ICM cells are divided into PrE and Epi cells, Xp reactivation appears  
1022 to be nearly complete only in the future Epiblast cells, accordingly to the loss of Xist and  
1023 H3K27me3. In PrE, some early-reactivated genes could already be silenced again. This  
1024 suggests a fluctuation of early-reactivated genes and different requirement of epigenetic  
1025 memory between early and late-reactivated genes.

1026 TE, Trophectoderm; PrE, Primitive Endoderm; ICM, Inner cell mass; Epi, Epiblast.

1027

1028 **Figure 5**

1029 **H3K27me3 UTX demethylase is required for proper reactivation of late-reactivated X-**  
1030 **linked genes.**

1031 **(a)** Conditional *Utx* allele: FD = Flp and Dre recombined conditional allele. Recombination  
1032 of the third exon of *Utx* by Cre expression gives rise to a knockout FDC allele (the GDF-9  
1033 driven Cre enables efficient recombination in the maternal germ line). FDC = Flp, Dre and  
1034 Cre recombined knockout allele.

1035 **(b)** Individual *Utx* control and mutant female ICM analysed by immunolabelling with  
1036 H3K27me3 (grey), combined with Xist RNA (green) and *Kif4* gene (red) at late (E4.5)  
1037 blastocyst stage. Enlarged nuclei are shown as example for not reactivated cells (1, 3) and  
1038 reactivated cell (2, 4). The cells below the white line illustrate the cluster of cells that have  
1039 lost Xist RNA coating and H3K27me3 enrichment on the Xp and are presumably the  
1040 epiblast. Scale bars represent 20µm.

1041 **(c)** Proportion (mean) of ICM cells showing enrichment of H3K27me3 on the Xist RNA-  
1042 coated X chromosome from E4.5 control (*Utx*<sup>FD/FD</sup>), heterozygous (*Utx*<sup>FDC/+</sup>) and mutant  
1043 (*Utx*<sup>FDC/FDC</sup>) female blastocysts. Below the graph the total cell number analysed is indicated,  
1044 followed by the total number of female embryos analysed in brackets. p-value<0.0057,  
1045 <0.0018 and <0.021 between control and heterozygous versus mutant respectively for  
1046 H3K27me3-Xist negative cells, H3K27me3-Xist positive cells and H3K27me3 positive, Xist  
1047 negative cells, by two-sided Dunn's test (Kruskal-Wallis and Post-hoc test ). \*\* for p-value  
1048 <0.01, \* for p-value <0.05.

1049 **(d)** Second example of individual *Utx* mutant female ICM analysed by immunolabelling with  
1050 H3K27me3 (grey), combined with Xist RNA (green) at late (E4.5) blastocyst stage. Red  
1051 arrows pointed cells with both Xist and H3K27me3 enrichment on the Xp. Blue arrows

1052 pointed nuclei with only H3K27me3 enrichment on the Xp. Scale bars represent 10  $\mu$ m.

1053 **(e)** Percentage (mean) of cells showing biallelic expression for X-linked genes in ICM of  
1054 independent E4.5 control ( $Utx^{FD/FD}$ ) and  $Utx$  mutant ( $Utx^{FDC/FDC}$ ) embryos. *Kif4*, *Rnf12* and  
1055 *Pdha1* are late or very-late reactivated genes, when *Abcb7* and *Atrx* are early-reactivated  
1056 genes based on both IF/RNA-FISH and scRNAseq.

1057 MW, Mann-Whitney nonparametric test.

1058 **(f)** Maximum intensity projection of control ( $Utx^{FD/FD}$ ) and  $Utx$  mutant ( $Utx^{FDC/FDC}$ ) E4.5  
1059 blastocysts analysed by immunofluorescence against NANOG (green) and GATA6 (red).  
1060 DAPI is in dark blue. Scale bars represent 20 $\mu$ m. Percentage of positive cells for Nanog,  
1061 Gata6 or both have been assessed and summarized as the mean. Below the graph the total cell  
1062 number analysed is indicated, followed by the total number of female embryos analysed in  
1063 brackets. Non significant (n.s.) by Kruskal-Wallis test.

1064



1065 **Supplemental Information**

1066

1067 **Differential epigenetic memory states and reactivation kinetics of the inactive X**  
1068 **chromosome in the inner cell mass.**

1069

1070 Maud Borensztein<sup>1,2\*</sup>, Ikuhiro Okamoto<sup>1,3\*</sup>, Laurène Syx<sup>1,4</sup>, Guillaume Guilbaud<sup>5</sup>, Christel  
1071 Picard<sup>1</sup>, Rafael Galupa<sup>1</sup>, Katia Ancelin<sup>1</sup>, Patricia Diabangouaya<sup>1</sup>, Nicolas Servant<sup>4</sup>,  
1072 Emmanuel Barillot<sup>4</sup>, Azim Surani<sup>2</sup>, Mitinori Saitou<sup>6</sup>, Chong-Jian Chen<sup>7</sup>, Konstantinos  
1073 Anastassiadis<sup>8</sup> and Edith Heard<sup>1</sup>.

1074

1075

1076

1077

1078 **Supplementary Figure 1 (related to Figure 4)**

1079 Heatmap representing the allele-specific expression of informative and well expressed X-  
1080 linked genes in each single cell, in E3.5 (Trophectoderm and ICM) and E4.0 (Primitive  
1081 Endoderm and Epiblast) female hybrid embryos (B6 x Castaneus). Strictly maternally  
1082 expressed genes (allelic ratio  $\leq 0.15$ ) are represented in red and strictly paternally expressed  
1083 genes (allelic ratio  $\geq 0.85$ ) in blue. Colour gradients are used in between and genes have been  
1084 ordered by genomic position. n=116 genes.

1085

1086 **Supplementary Figure 2 (related to Figure 4)**

1087 **(a)** Correspondence analysis (CA) of X-linked gene reactivation and silencing classes based  
1088 on their timing of reactivation in ICM and timing of silencing during imprinted XCI in pre-  
1089 implantation embryos as previously determined in Borensztein *et al*, 2017<sup>7</sup>.

1090 **(b)** Distance to *Xist* genomic locus. Distribution of the genomic distances to *Xist* locus (in  
1091 Mb) for the different X-linked gene reactivation classes. Transcription Start Site (TSS) of  
1092 each gene has been used to measure the distance to *Xist* locus. Non-significant by Kruskal-  
1093 Wallis test. Boxplot represent median with lower and upper quartiles.

1094 **(c)** Percentage of X-linked genes from the different reactivation classes classified by their  
1095 relative position to *Xist* “entry” sites (as identified during XCI induction in ESCs<sup>37</sup>: “inside”  
1096 (TSS located in a *Xist* “entry” site), “next to” (TSS located less than 100 kb to an “entry” site)  
1097 and “outside” (over 100 kb from an “entry” site). Non-significant by Kruskal-Wallis test.

1098 **(d)** Expression level of X-linked genes in the different reactivation-timing classes in E3.5  
1099 ICM samples (mean of each single gene). No differences in expression level can be seen for  
1100 early reactivated and escapees genes compared to late and very late genes. Boxplot represent  
1101 median with lower and upper quartiles. Non-significant by Kruskal-Wallis test.

1102 **(e)** Enrichment of H3K27me3 and H4K4me3 on maternal X obtained from (Zheng *et al*,  
1103 2016)<sup>38</sup>. Each dot represents a single gene. *Xist* dot is highlighted with an orange arrow. No  
1104 differences can be seen for H3K27me3 distribution in any reactivation-timing groups (by  
1105 Wilcoxon test), contrary to the paternal X (Figure 4c). Enrichment of H3K4me3 is much  
1106 higher on maternal X chromosome compared to all paternal X (Figure 4c). Very late genes  
1107 are significantly different compared to Early and Escapee groups for H3K4me3 maternal  
1108 enrichment by Wilcoxon test (respectively  $p=3.61 \cdot 10^{-3}$  and  $p=1.71 \cdot 10^{-4}$ ).

1109 **(f)** Expression level of X-linked genes in function of their enrichment of H3K4me3 on

1110 maternal (left) and paternal (right) X chromosomes. Low, intermediate (Inter) and highly  
1111 (High) enriched classes have been designed by H3K4me3 sum scores  $<5$ ,  $5 \leq$  and  $\geq 15$ , and  
1112  $>15$  respectively. On the maternal and paternal X chromosomes, lowly enriched genes for  
1113 H3K4me3 marks are significantly less expressed than highly expressed ones (respectively  
1114  $p=0.028$  and  $p=0.045$ , by Dunn's test). Boxplot represent median with lower and upper  
1115 quartiles.

1116 (g) Representation of the Gene ontology analysis of Biological process performed on the best  
1117 correlated genes with X-linked gene reactivation (q-value  $<0.05$ , Supplemental Table 3). The  
1118 twelve best enrichment classes (based on fold enrichment) are represented with their p-value.

1119 (h) The level of expression of *Myc* genes (*Myc*, *Mycn* and *Mycl*) is plotted in function of the  
1120 number of biallelically/reactivated X-linked genes in each single cell. Different colours are  
1121 applied for E3.5 trophectoderm (TE), E3.5 ICM, E4.0 Primitive endoderm (PrE) and E4.0  
1122 Epiblast (Epi) cells. By Spearman correlation, a positive correlation is seen between level of  
1123 expression of *Myc* and *Mycl* and high percentage of biallelically expressed genes. Genes with  
1124 level of expression as (RPRT $<1$ ) are considered as non-expressed in our samples.

1125 (i) Mean ( $\pm$  s.e.m.) of the number of *Myc* family (*Mycn* and *Myc*) binding sites per gene in  
1126 each reactivation-timing groups, obtained from Chen et al., 2008<sup>39</sup>. There is a significantly  
1127 higher number of genes with at least one binding site for *Myc* factors in early and escapee  
1128 groups,  $p=0.0269$  by Kruskal-Wallis test. *Xist* is highlighted with an orange arrow.

1129

1130

1131 **Supplementary Figure 3 (related to Figure 5)**

1132 **(a)** Level of expression of *Utx* gene during preimplantation mouse development (expression  
1133 mean of all single cells). *Utx* is downregulated in trophectoderm but stay expressed in ICM  
1134 cells at E3.5.

1135 **(b)** Maximum intensity projection of 1.5  $\mu\text{m}$  section for control (*Utx*<sup>FD/FD</sup> female and *Utx*<sup>FD/Y</sup>  
1136 male) and mutant (*Utx*<sup>FDC/FDC</sup> female and *Utx*<sup>FDC/Y</sup> male) E4.5 blastocysts analysed by  
1137 immunofluorescence against UTX (red). DAPI is in dark blue. Enlarged nuclei are shown.  
1138 Scale bars represent 20 $\mu\text{m}$ .

1139 **(c)** Proportion (mean) of ICM cells showing enrichment of H3K27me3 on the Xist RNA  
1140 coated X chromosome from E4.5 control (*Utx*<sup>FD/FD</sup>), heterozygous (*Utx*<sup>FDC/+</sup>) and mutant  
1141 (*Utx*<sup>FDC/FDC</sup>) female blastocysts, linked with *Rnf12* allelic status.

1142 **(d)** Proportion (mean) of ICM cells showing enrichment of H3K27me3 on the Xist RNA  
1143 coated X chromosome) from E4.5 control (*Utx*<sup>FD/FD</sup>) and mutant (*Utx*<sup>FDC/FDC</sup>) female  
1144 blastocysts, linked with *Kif4* allelic status.

1145

1146

1147 **Supplementary Table 1: Summary of single cell RNAseq samples.**

1148 For each library is provided: single cell's name, stage, embryo number, gender, cross and the

1149 raw read number, filtered ones and percentage of mapping.

1150

1151

1152 **Supplementary Table 2: Silencing gene classes**

1153 Reactivation timing and allelic ratio for the 116 informative and well-expressed X-linked  
1154 genes in hybrid ICM cells (B6 x Cast cross).

1155

1156

1157

1158 **Supplementary Table 3: List of genes correlated or anti-correlated with X-linked gene**

1159 **reactivation between E3.5 and E4.0.**

1160

1161

1162



1163 **Supplementary Table 4: List of RNA-FISH probes and antibodies**

1164

1165

1166

1167

Figure 1

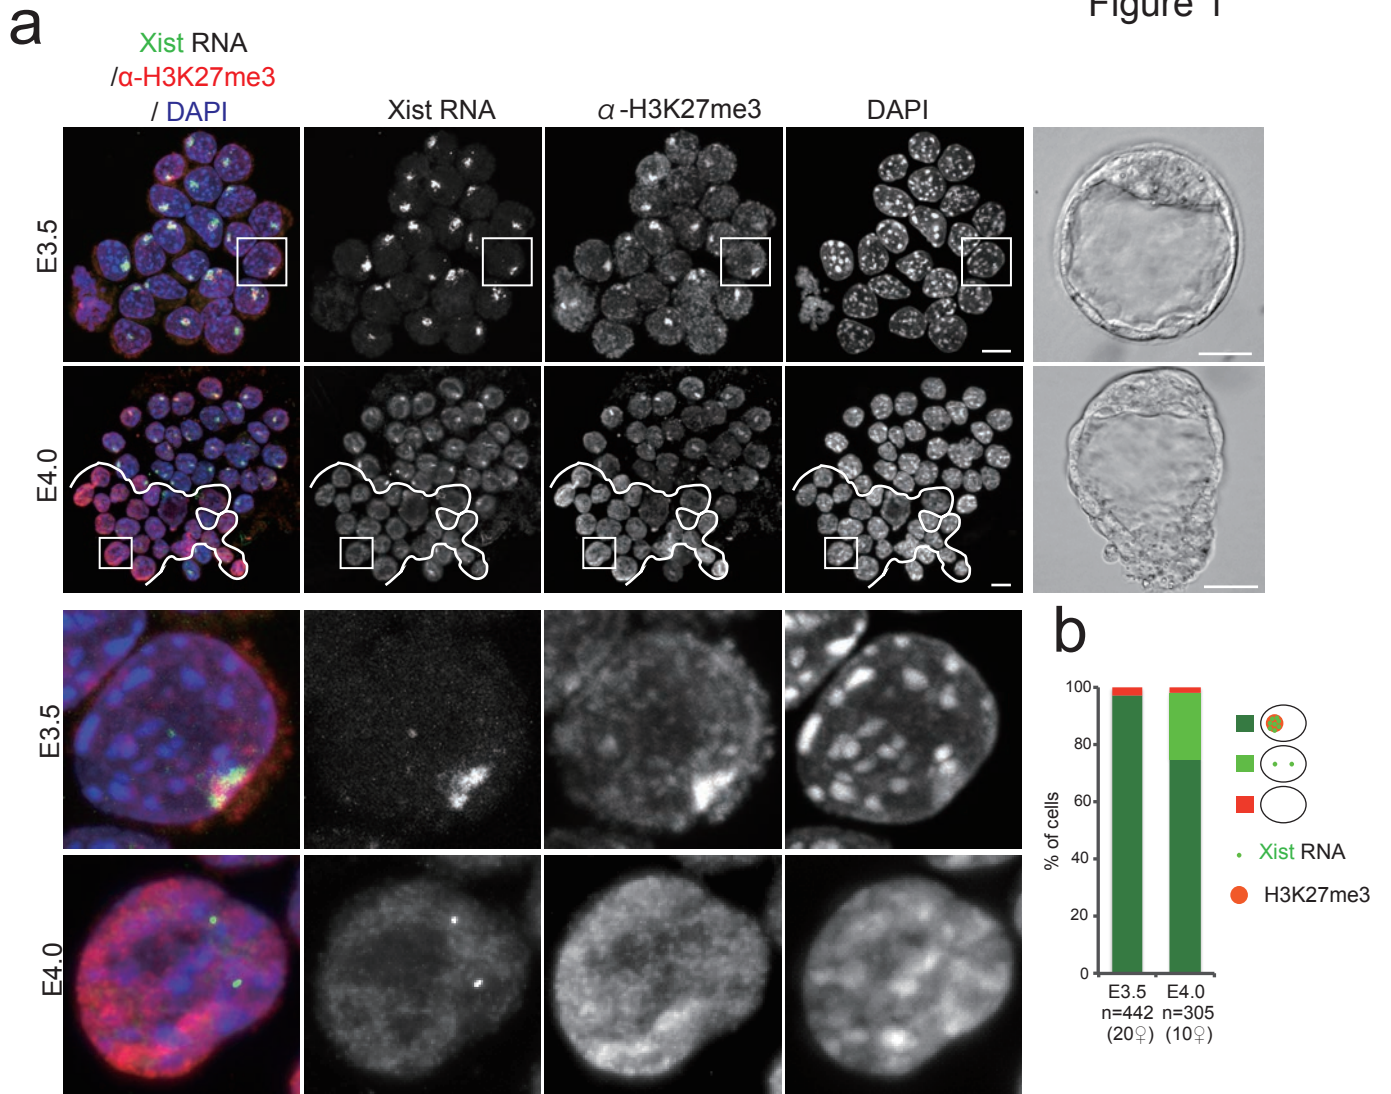

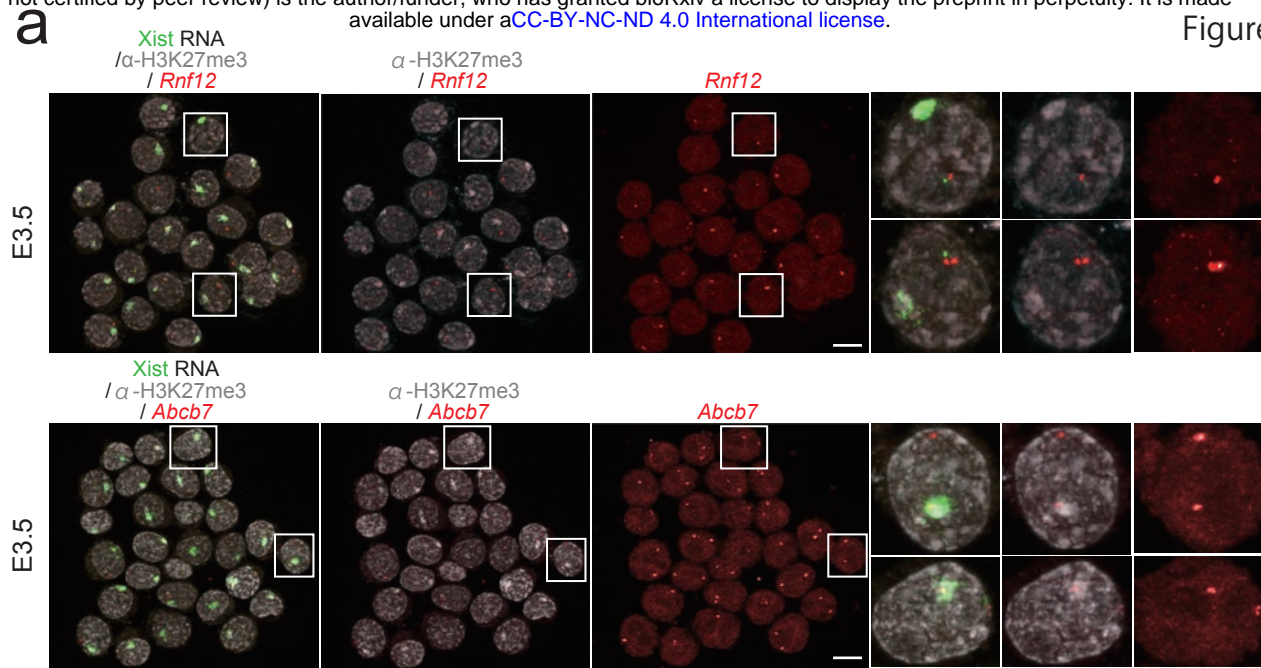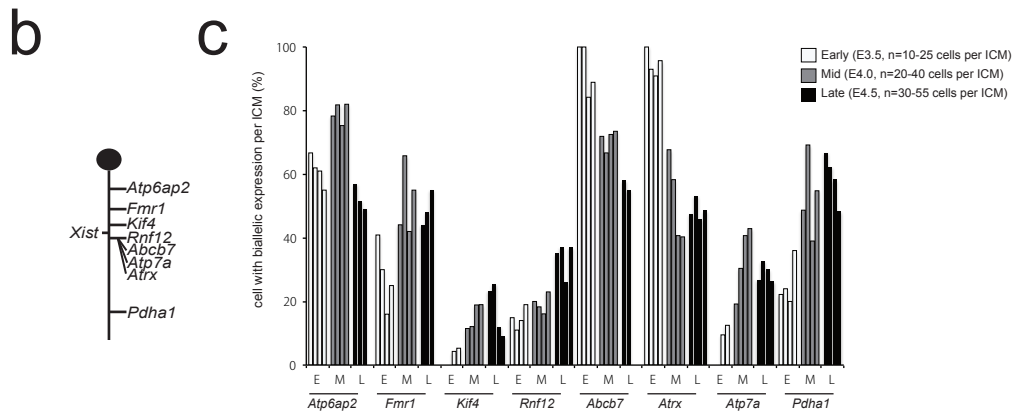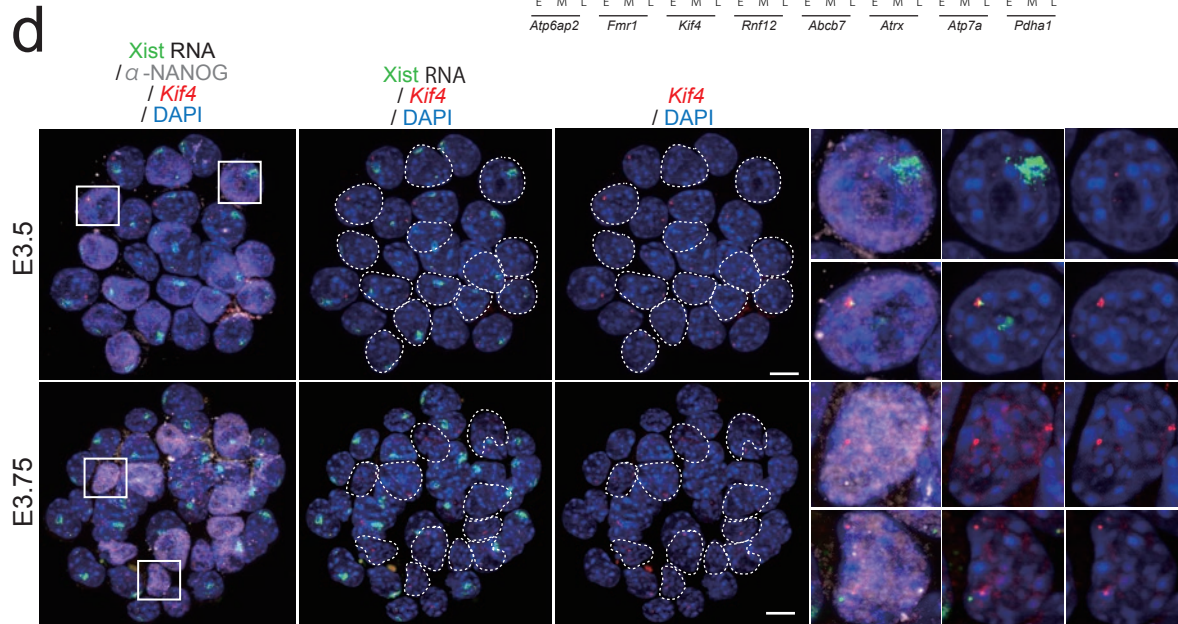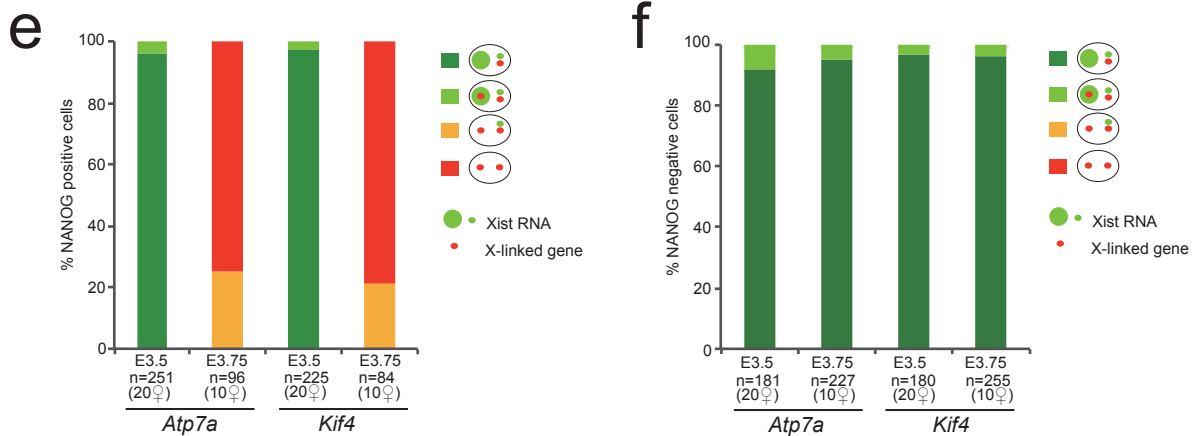

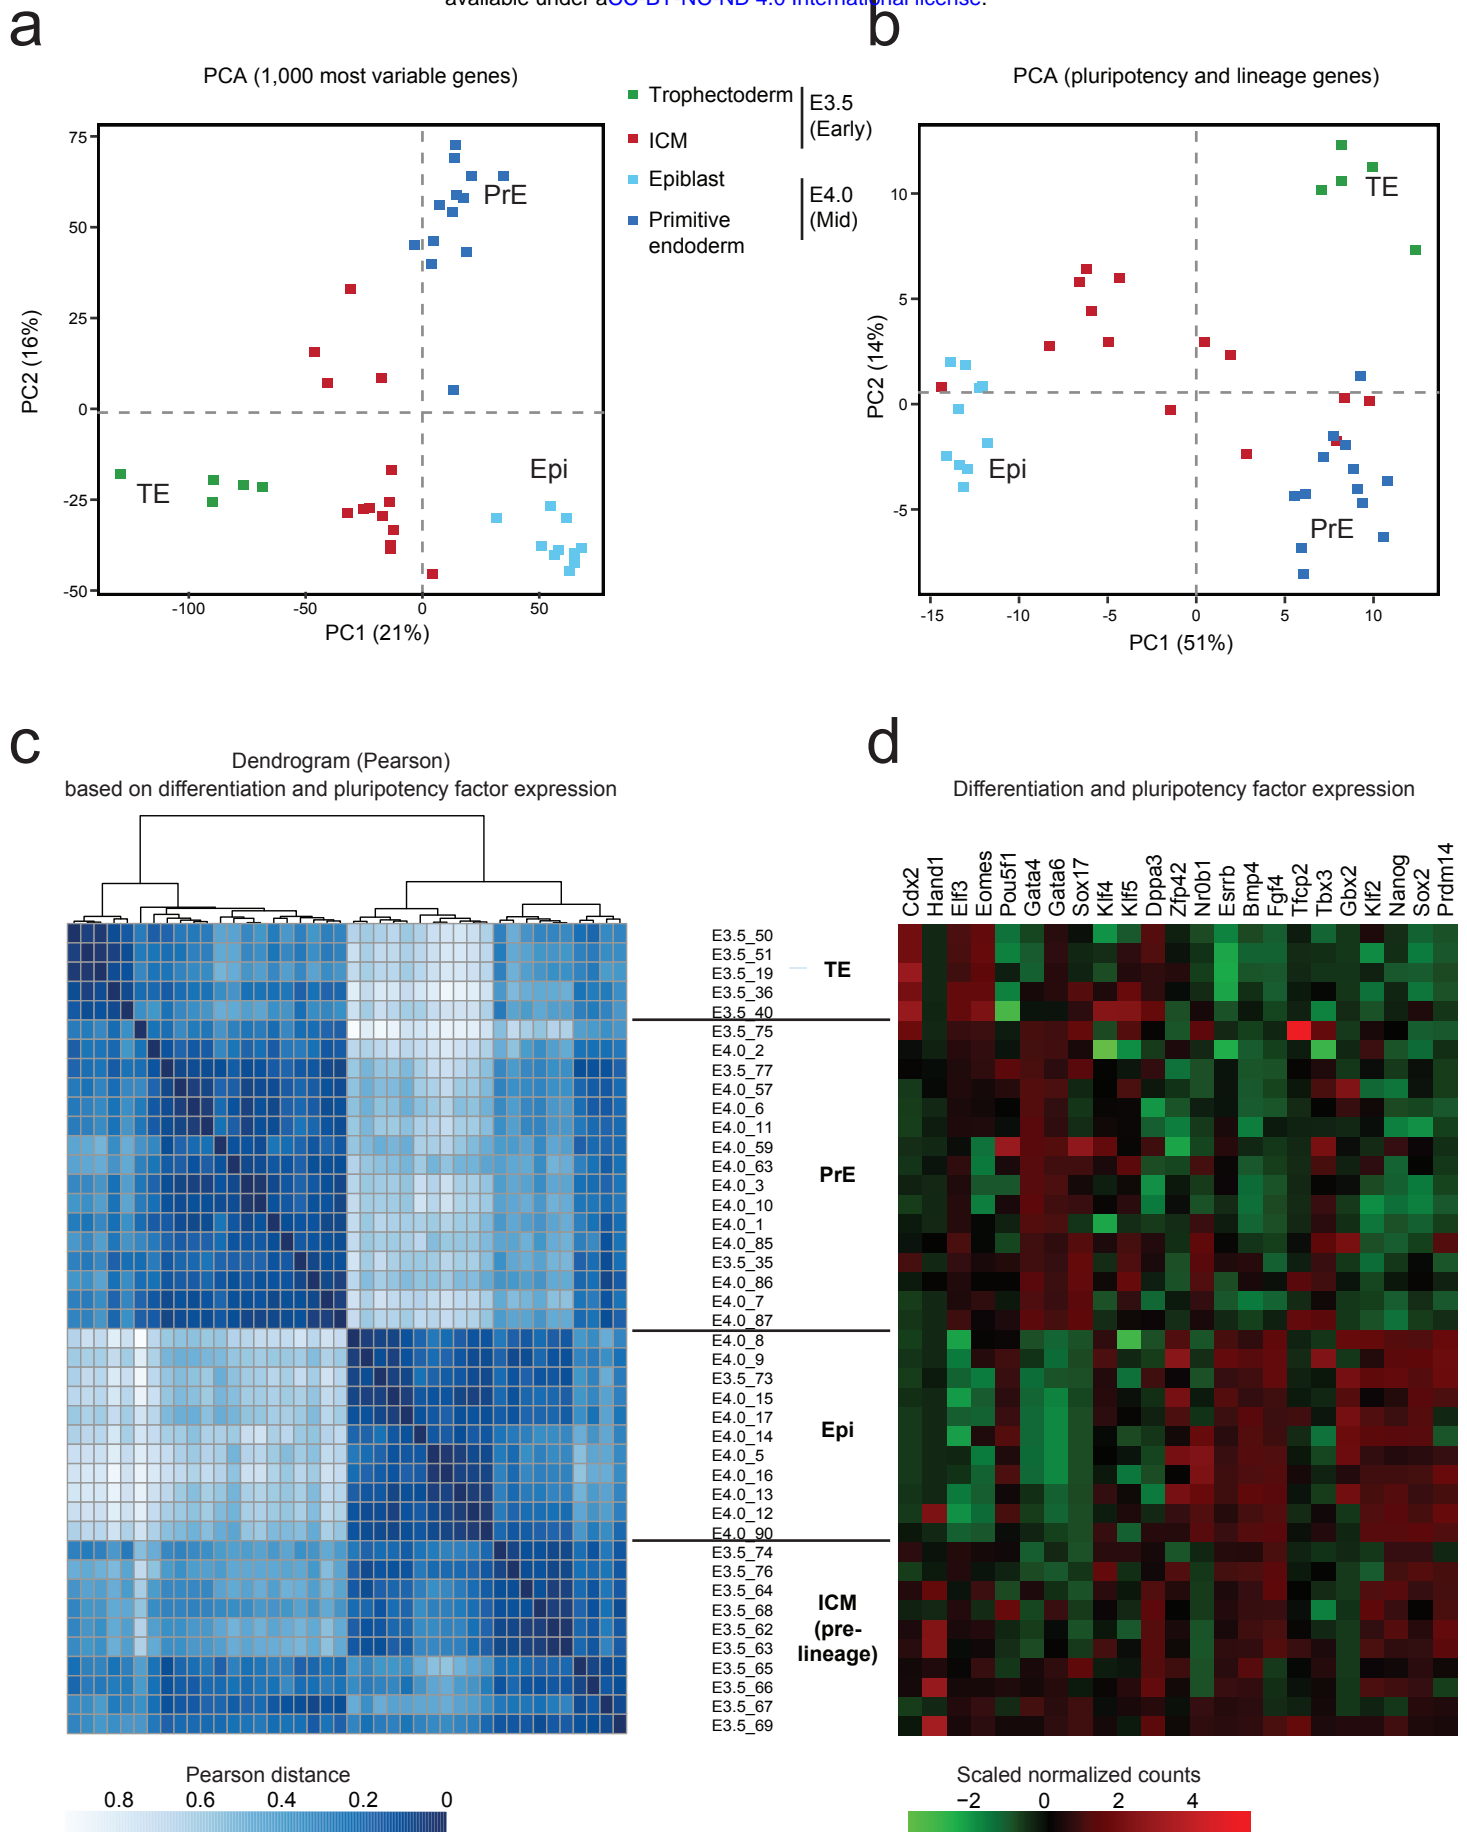

Figure 3

**a**

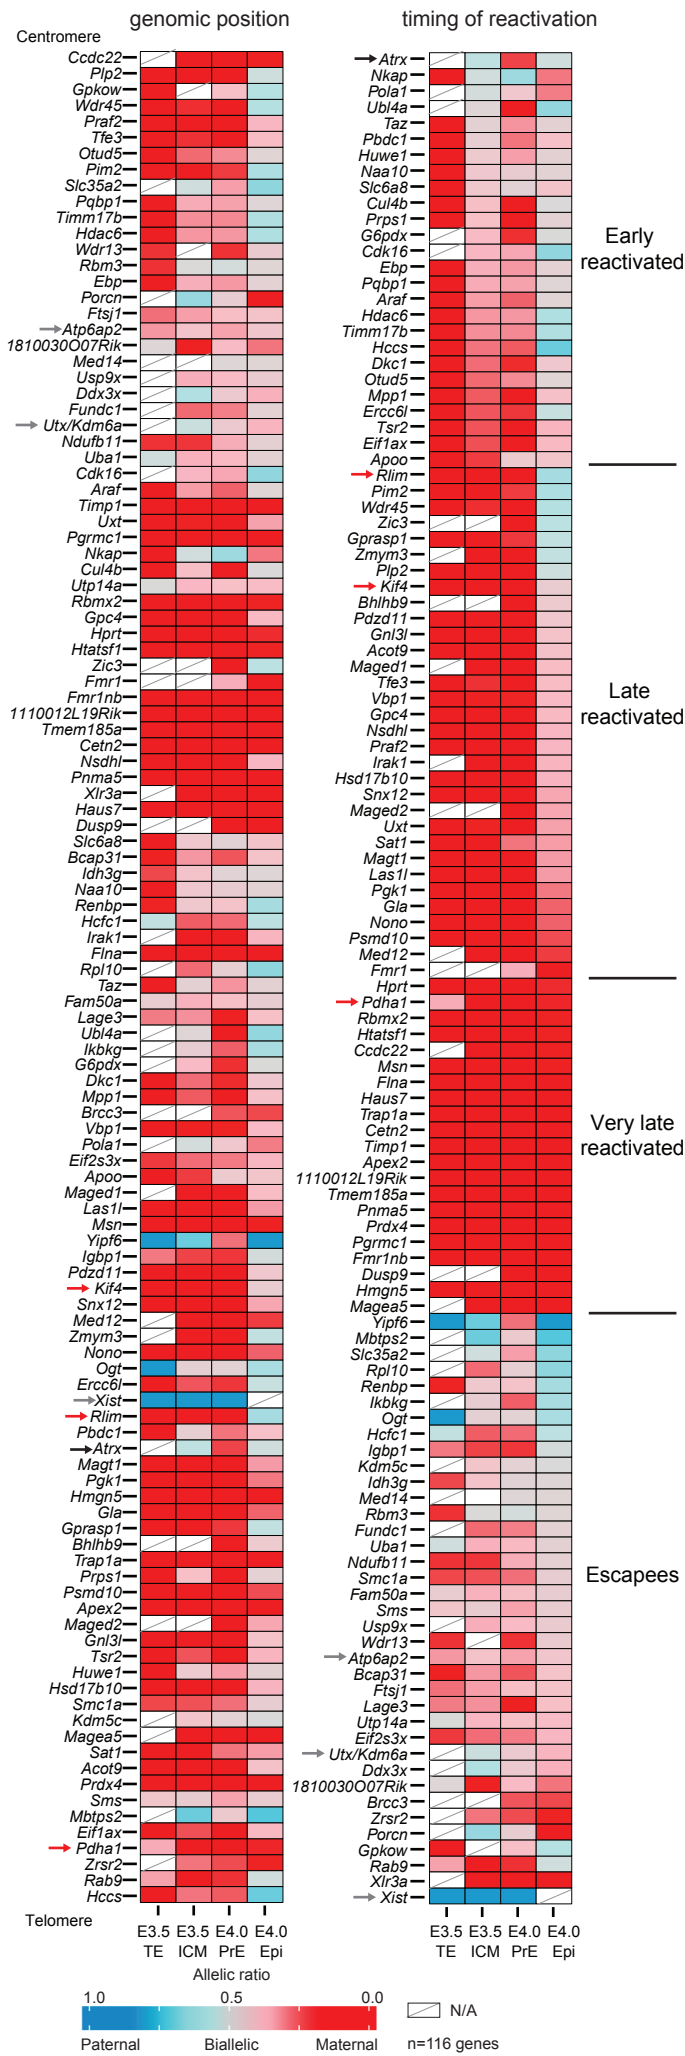

**b**

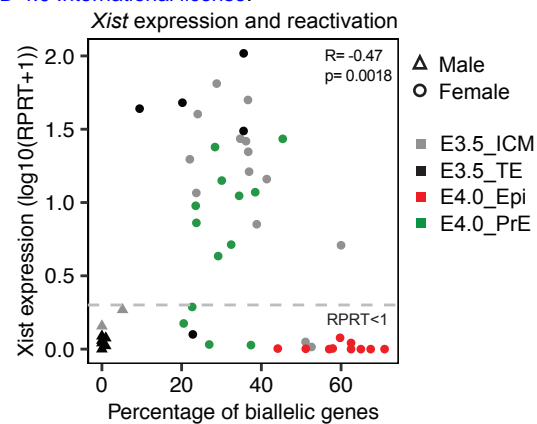

**c**

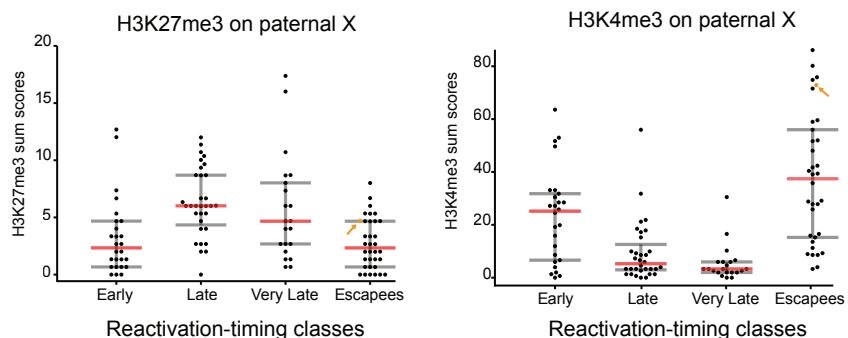

**d**

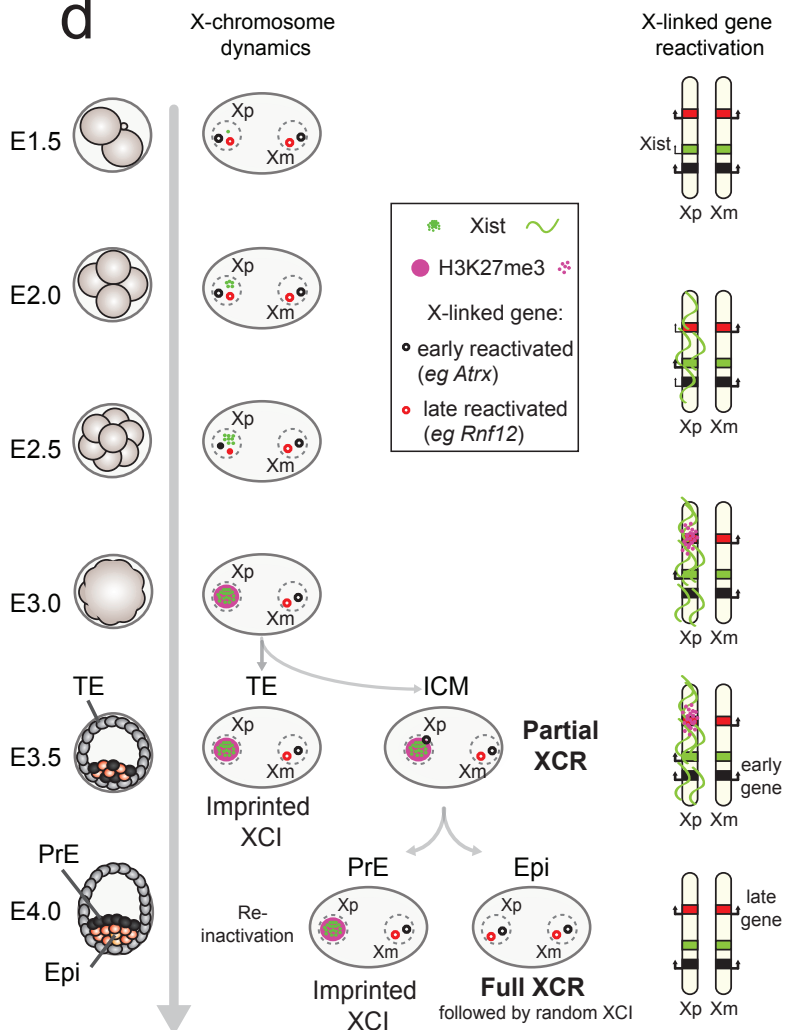

Figure 4

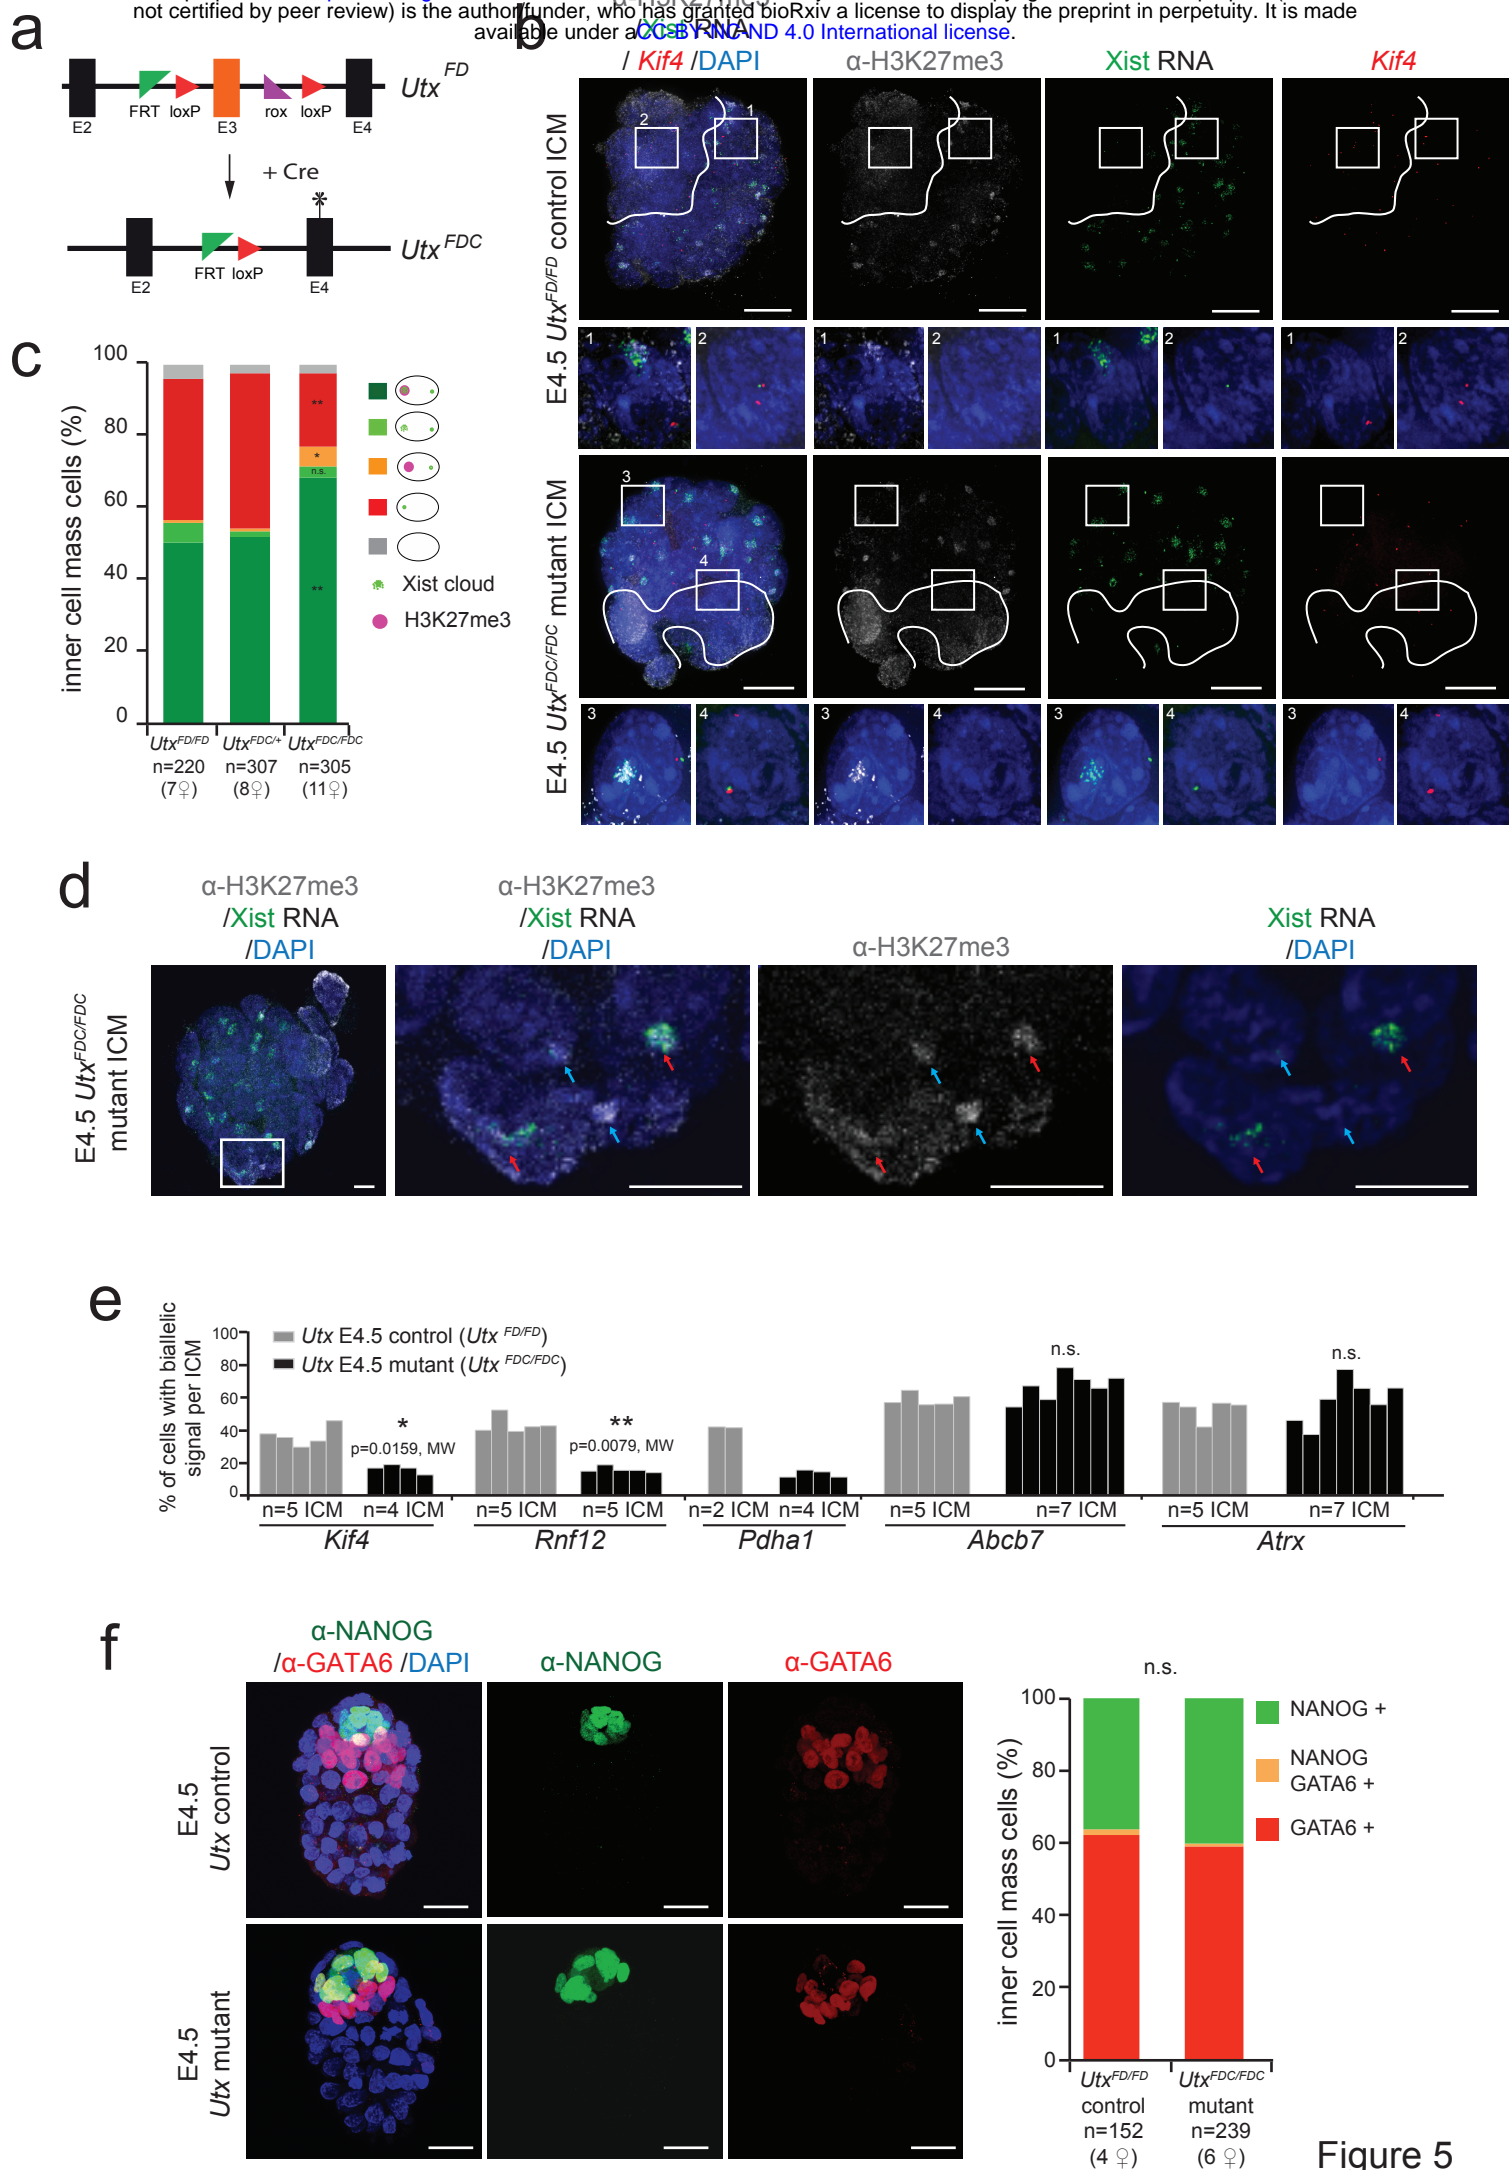

Figure 5

Centromere

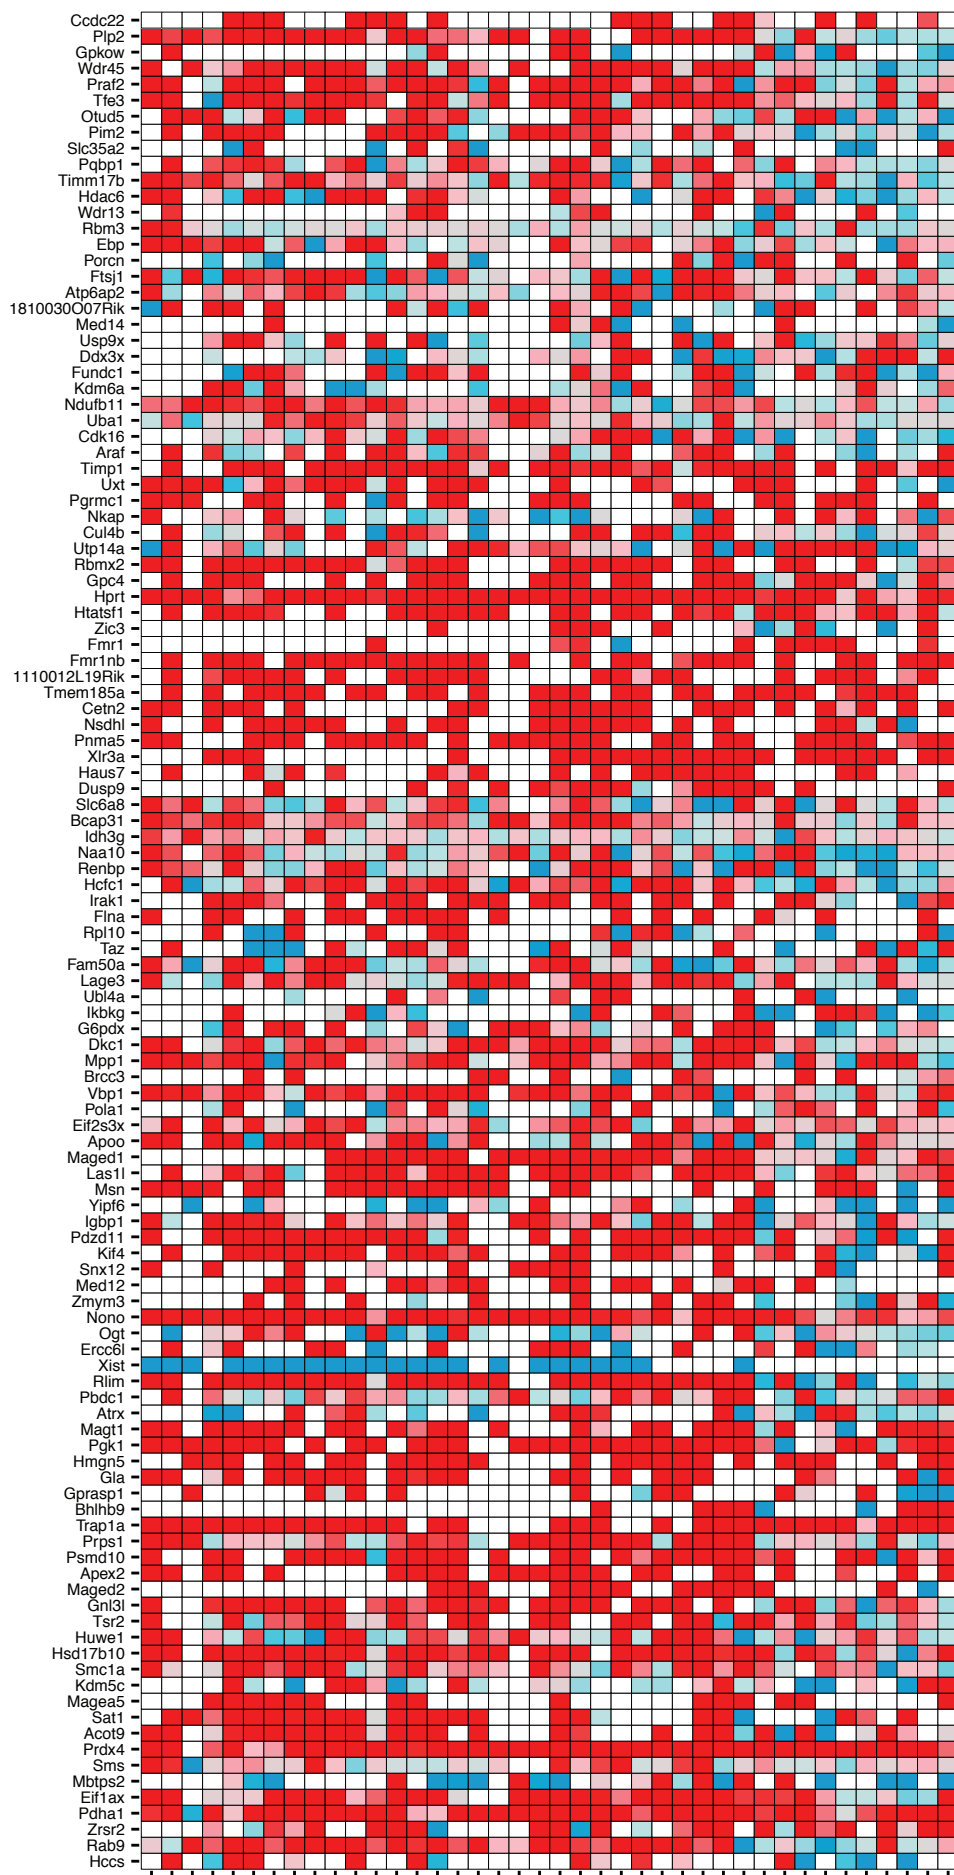

Telomere

n=116 genes

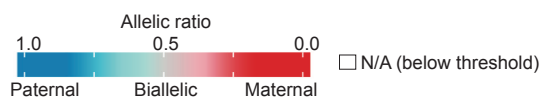

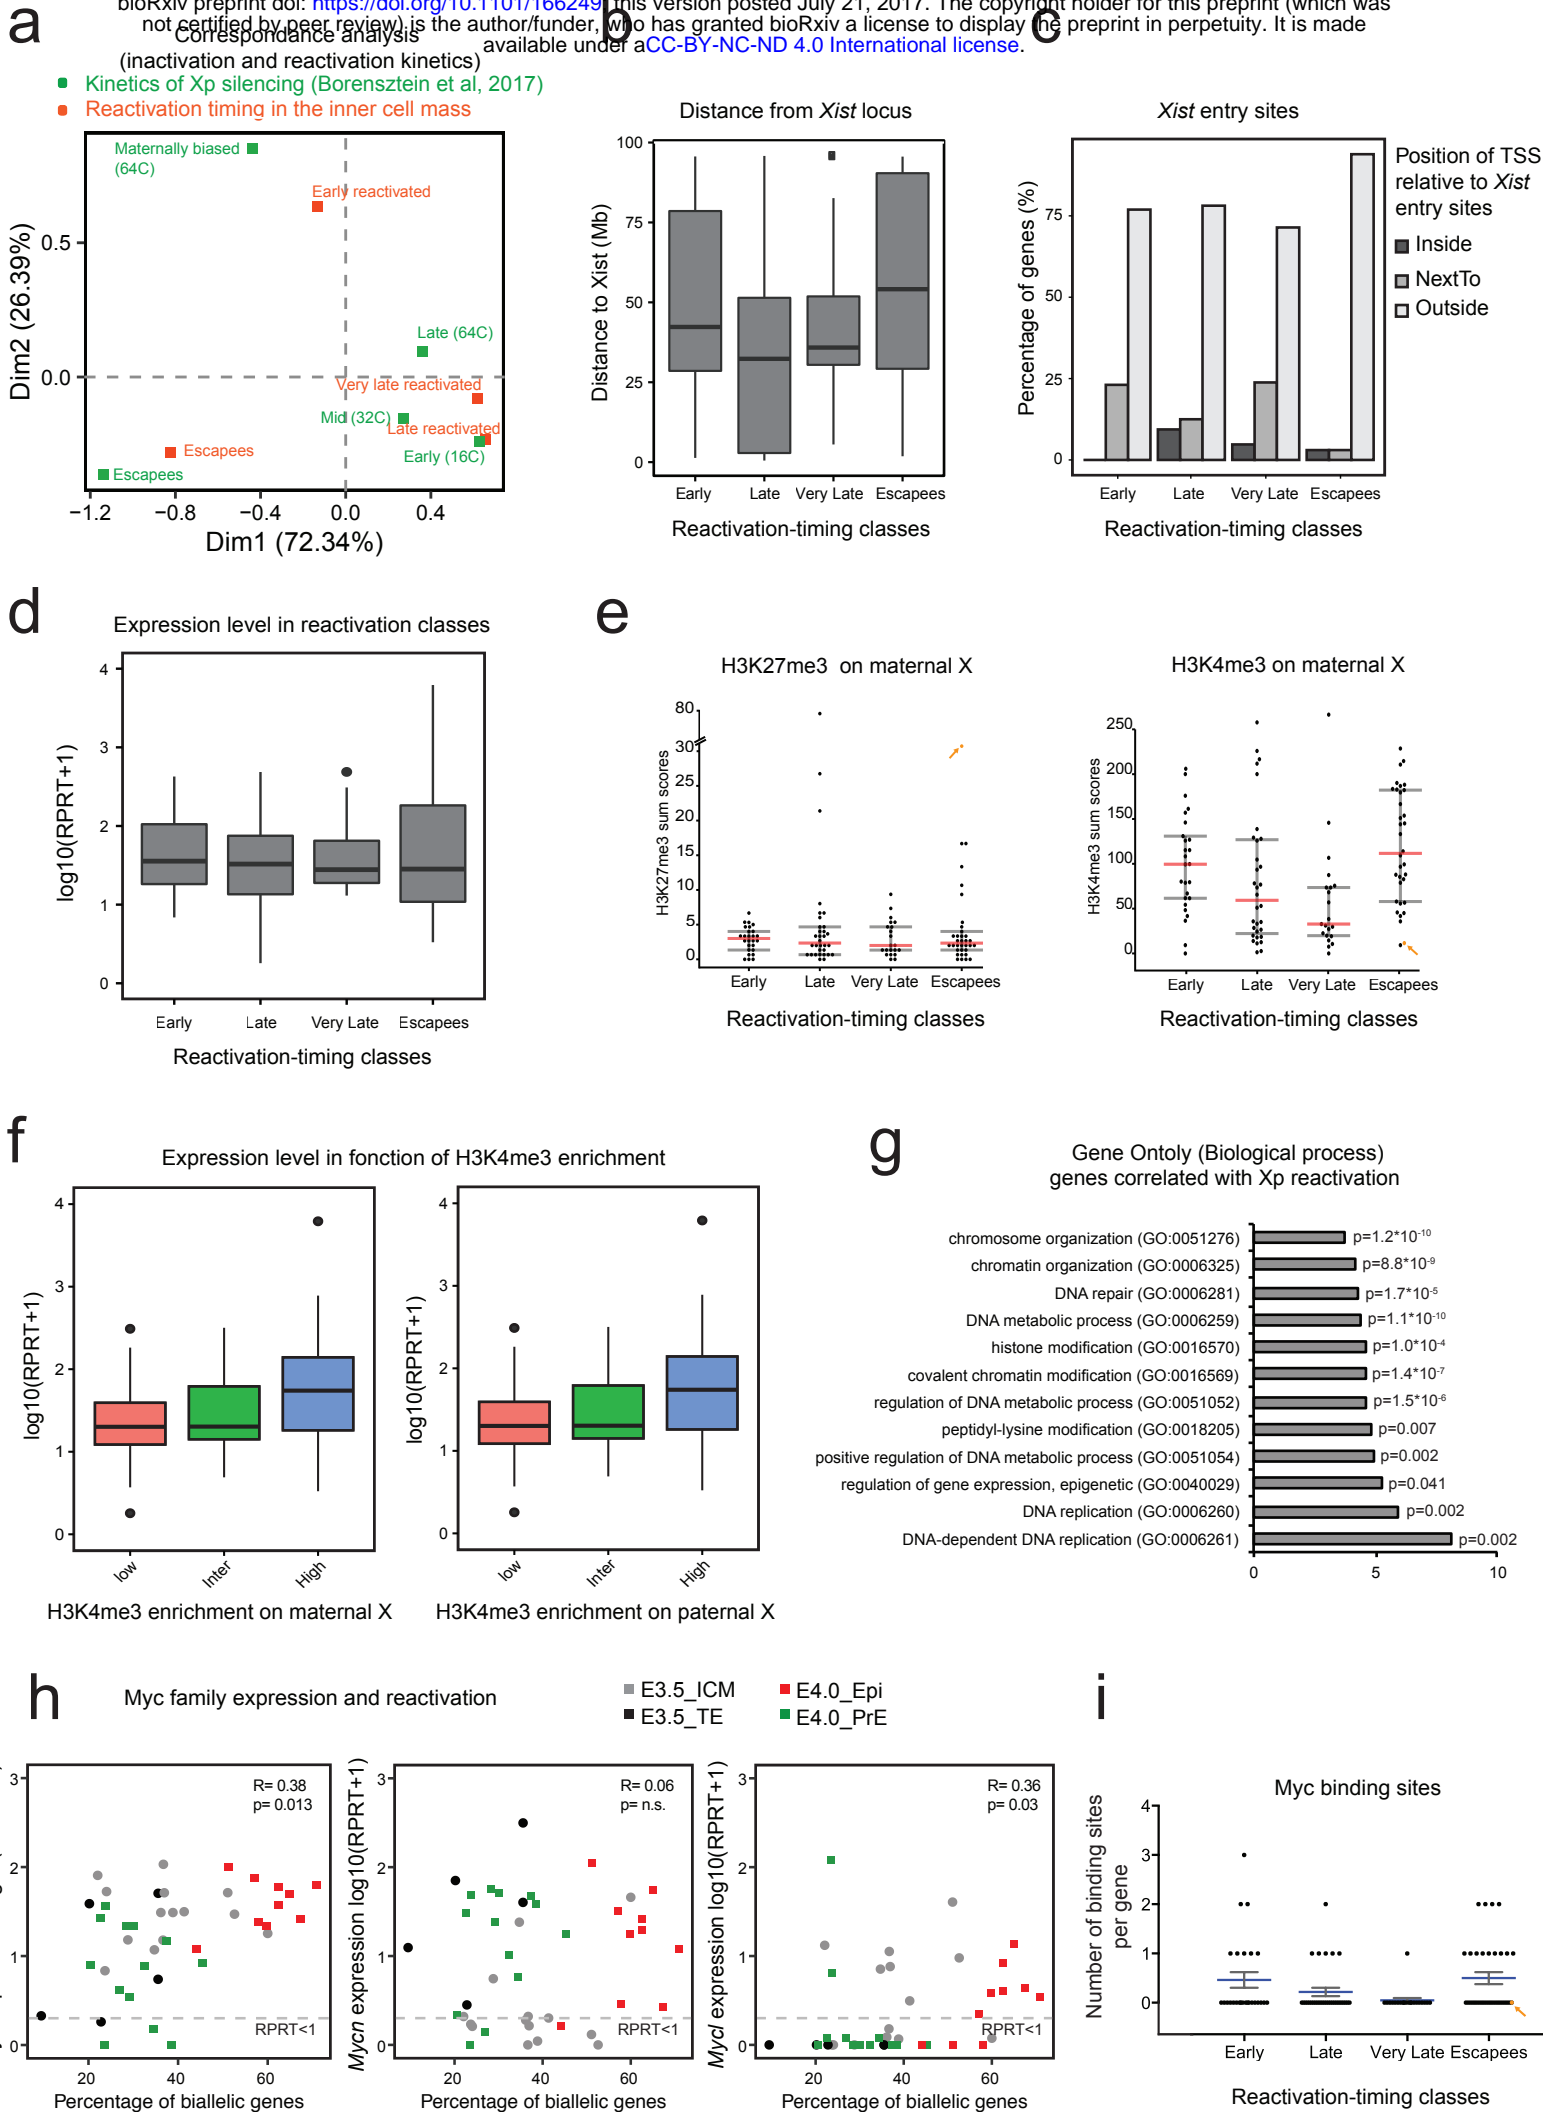



**a**

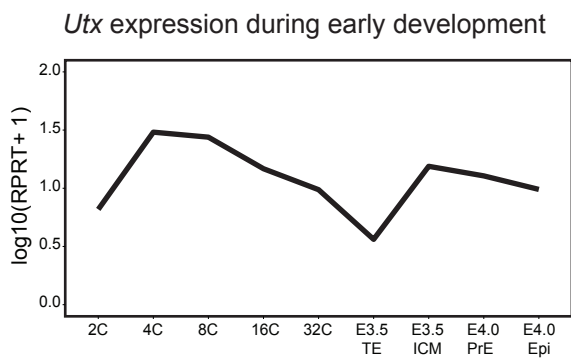

**b**

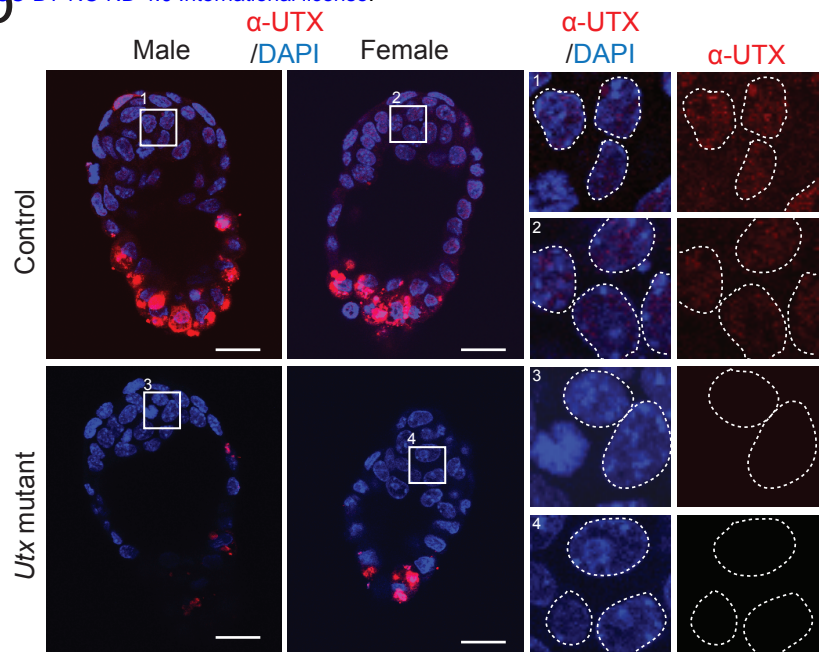

**c**

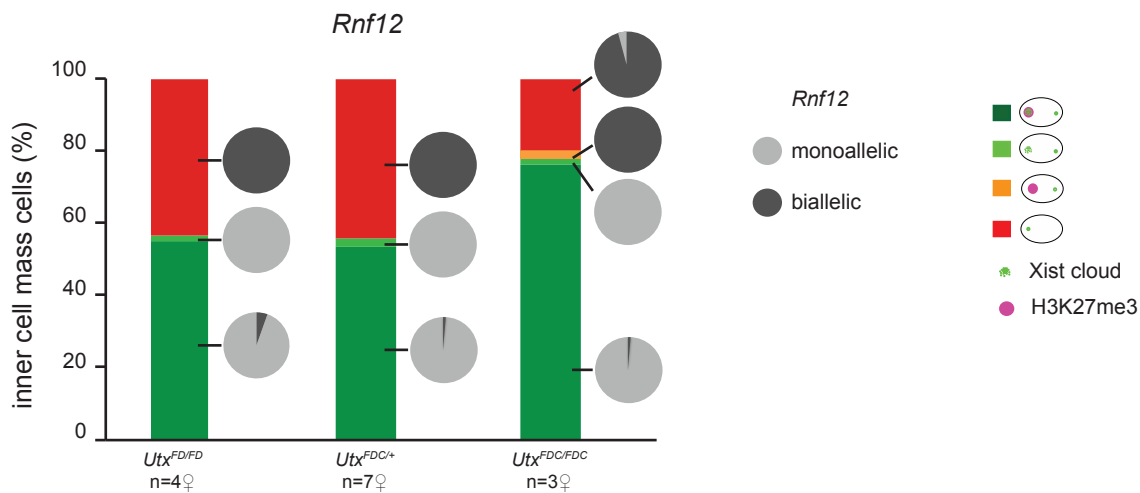

**d**

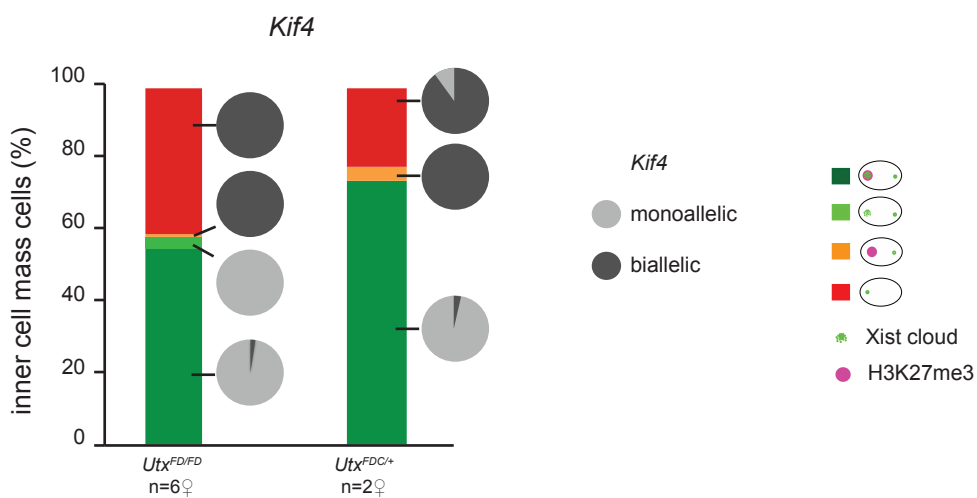

Source: http://biorxiv.org/content/10.1101/166249v1.full.pdf
